# Supplementary material for: Design and synthesis of non-hydroxamate lipophilic inhibitors of 1-deoxy-d-xylulose 5-phosphate reductoisomerase (DXR): in silico, in vitro and antibacterial studies
Source: Royal Society of Chemistry journal article supplement (doi:10.1039/d4ra05083e), 2024-01-01
Supplement: d4ra05083e1.pdf [file d4ra05083e1.pdf]

----- SUPPLEMENTARY INFORMATION -----

**Design and synthesis of non-hydroxamate lipophilic inhibitors of 1-deoxy-D-xylulose 5-phosphate reductoisomerase (DXR): in silico, in vitro and antibacterial studies**

Sharyu Kesharwani<sup>1</sup>, Eeba<sup>2</sup>, Mukesh Tandi<sup>1</sup>, Nisheeth Agarwal<sup>2</sup>, Sandeep Sundriyal<sup>1\*</sup>

<sup>1</sup>Department of Pharmacy, Birla Institute of Technology and Science-Pilani (BITS), Pilani Campus, Vidya Vihar, Pilani, Rajasthan, 333 031, India

<sup>2</sup>Translational Health Science and Technology Institute, NCR Biotech Science Cluster, 3rd Mile Stone, Gurugram-Faridabad Expressway, Faridabad 121001, Haryana, India

\*Corresponding author

Email: [sandeep.sundriyal@pilani.bits-pilani.ac.in](mailto:sandeep.sundriyal@pilani.bits-pilani.ac.in)

| <b>Contents</b>                                          | <b>Page No.</b> |
|----------------------------------------------------------|-----------------|
| Figure S1                                                | S2              |
| Figure S2                                                | S3              |
| Figure S3                                                | S4              |
| Figure S4                                                | S5              |
| Figure S5                                                | S5              |
| Figure S6                                                | S6              |
| Table S1                                                 | S7 – S10        |
| Table S2                                                 | S10             |
| Table S3                                                 | S11             |
| Table S4                                                 | S11-S12         |
| IC50 curves of representative compounds (Figures S7- S9) | S13-S14         |
| Spectral Data for compounds (Figures S10 to S76)         | S14-S48         |

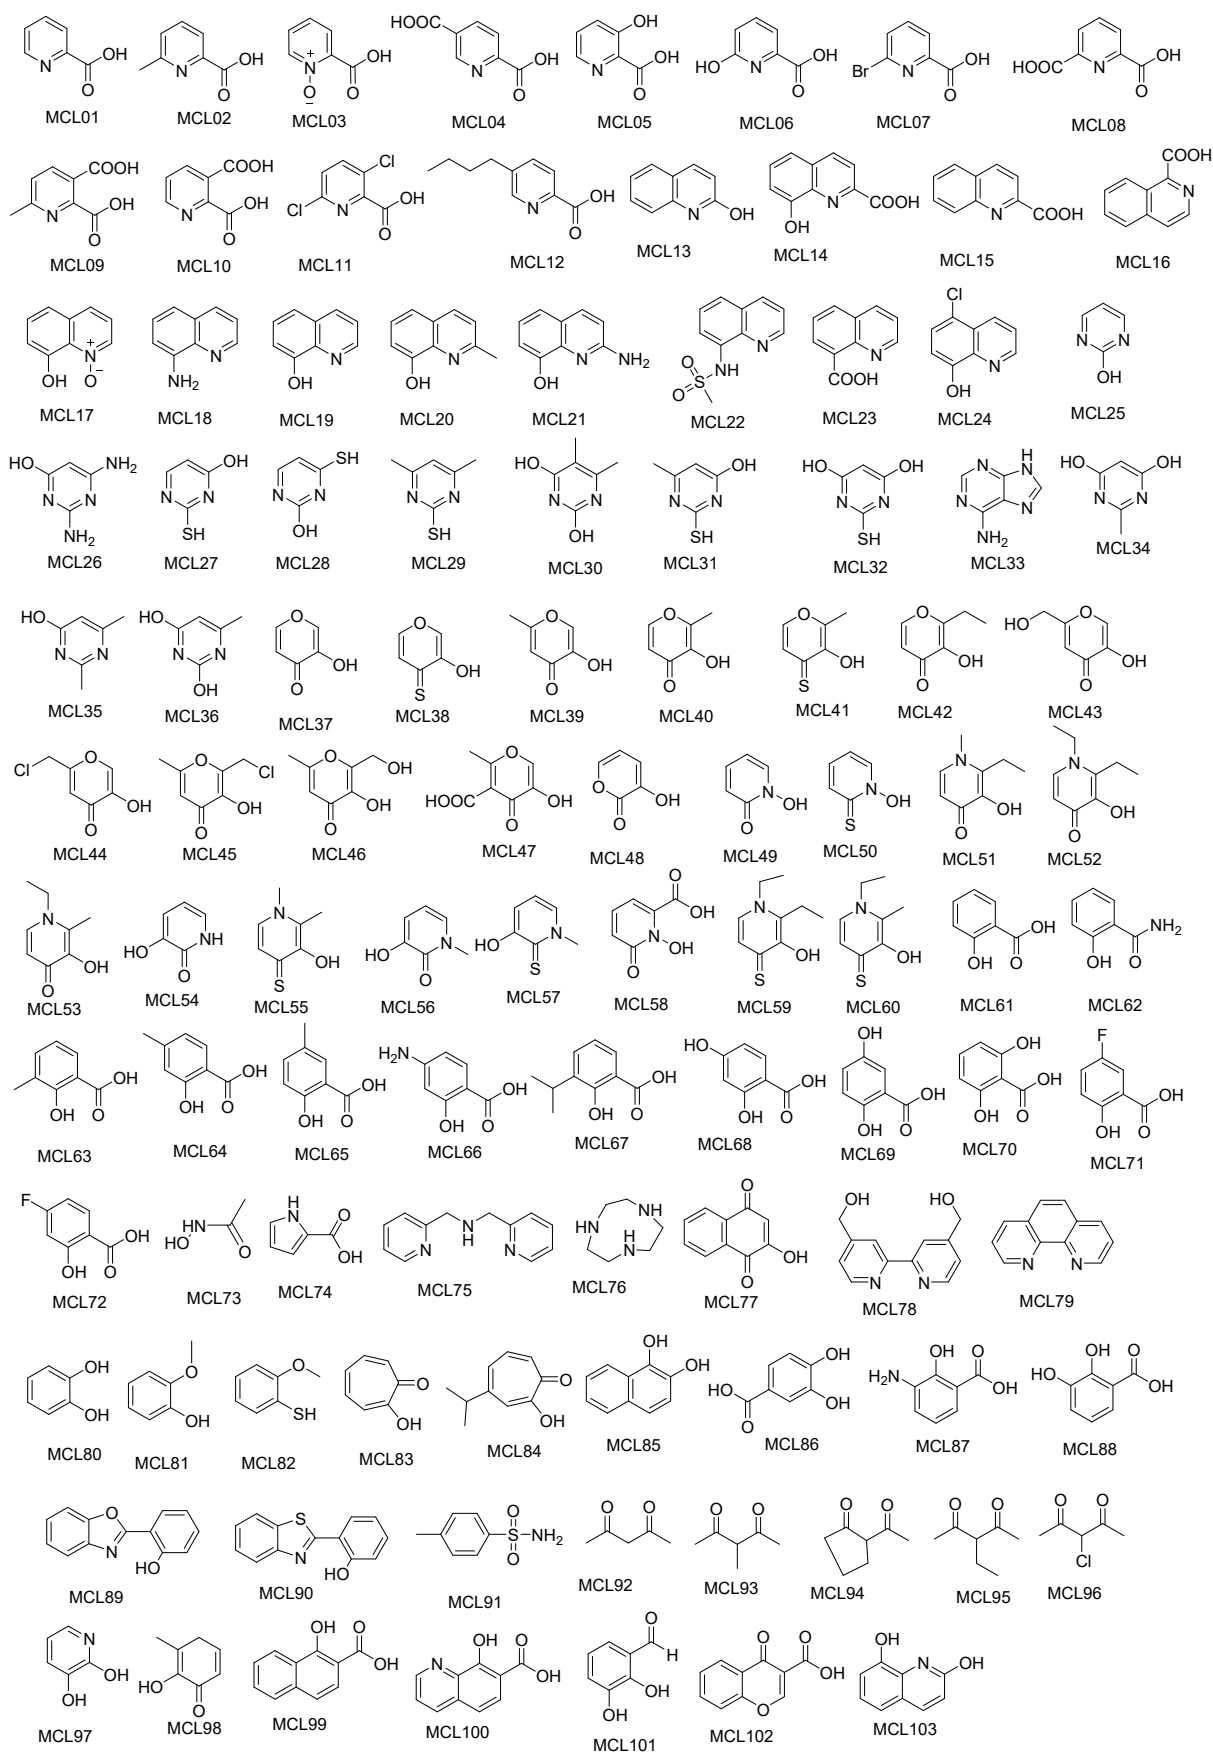

**Figure S1.** Structure of fragments in MCL

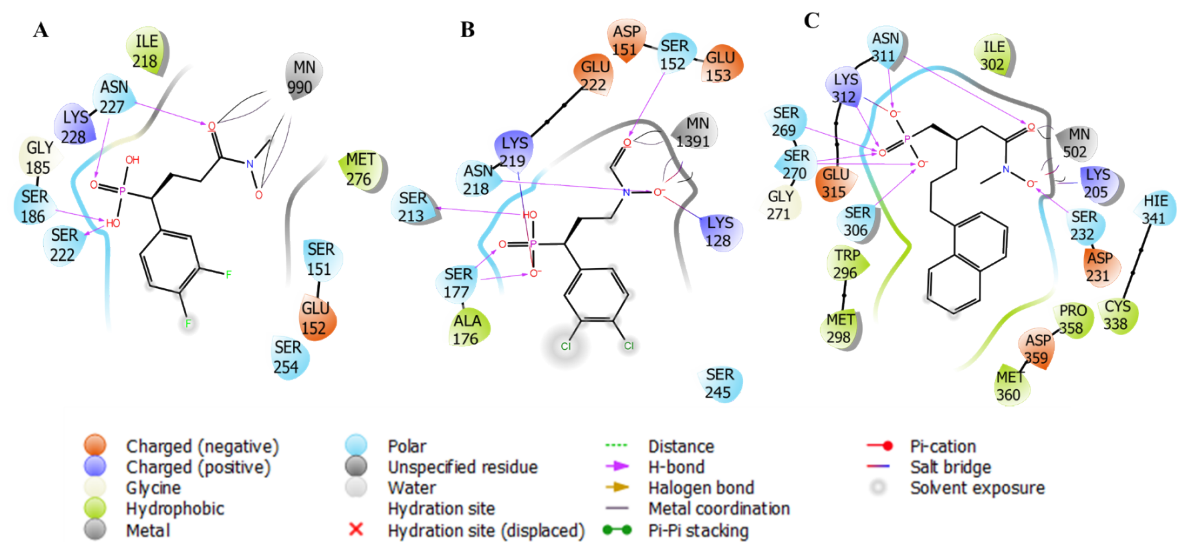

**Figure S2.** Interactions of the cocrystallized ligands at the binding site of (A) 3R0I (B) 2Y1D (B), and (C) 5JAZ

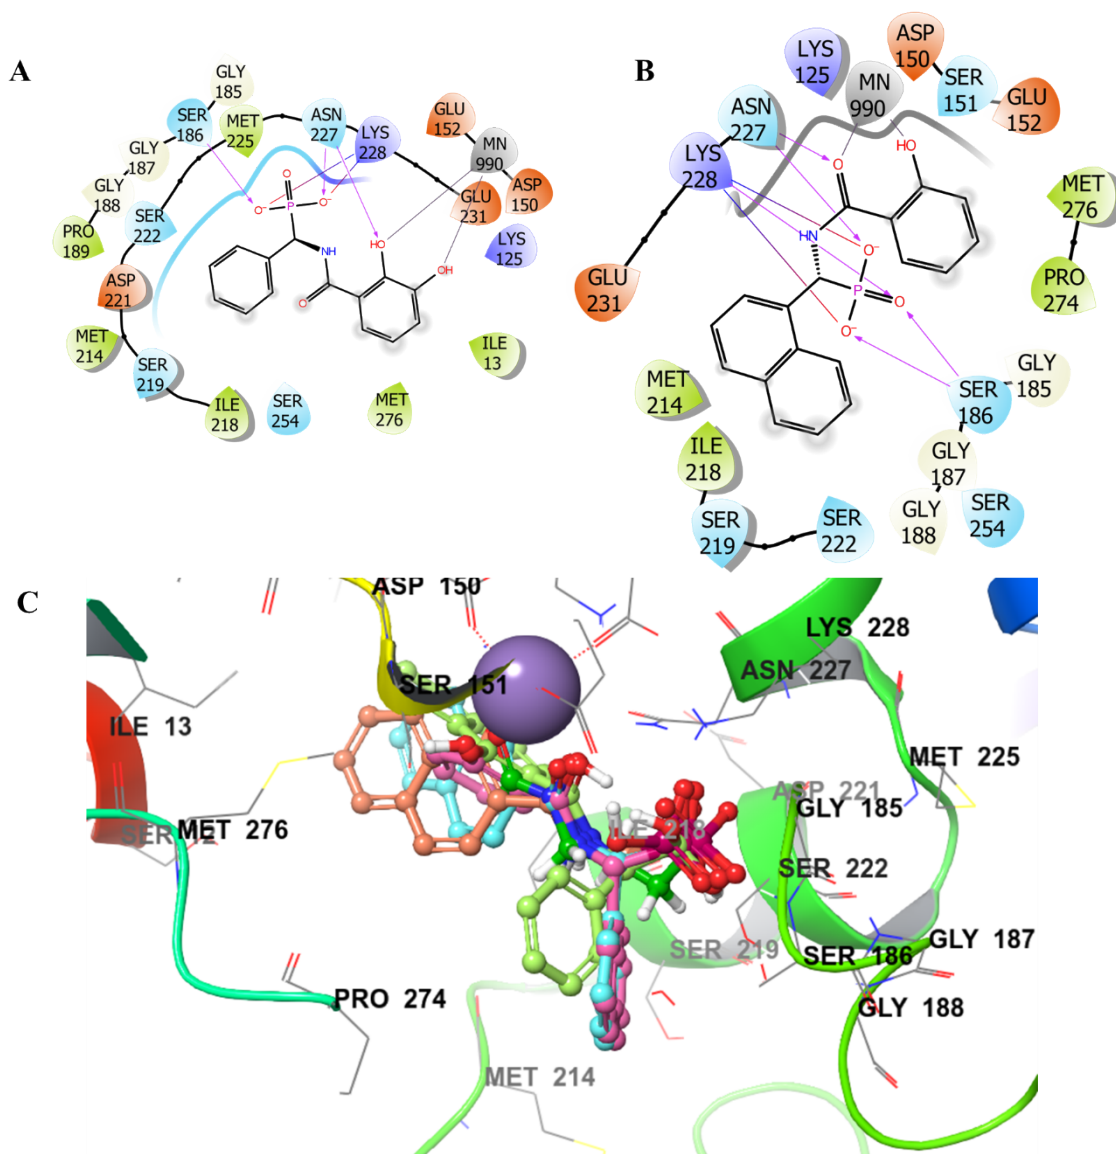

**Figure S3.** Interaction of the designed molecules with DXR active site (PDB ID 3R0I) (A) derivative of fragment F2 (Docking score: -6.43 kcal/mol) displaying metal binding with the catechol hydroxy groups (B) derivative of fragment F12 (Docking score: -4.47 kcal/mol) displaying metal binding with amide carbonyl and phenolic Oxygen (C) 3D view of the designed derivatives occupying pocket A (by lipophilic R<sub>1</sub> substituent), and pocket B lined by Pro274 and Met276 residues (by aromatic rings of MBGs).





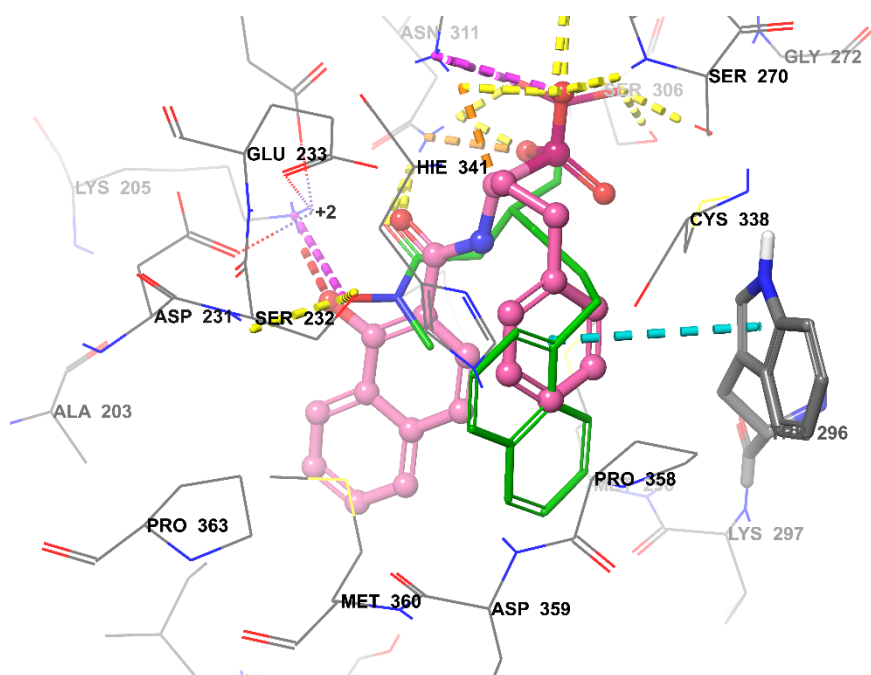

**Figure S5.** Pi-pi stacking interaction between the phenyl R<sub>1</sub> substituent of the ligands derived from F7 (pink ball and sticks) with the indole ring of Trp296 residue of DXR (PDB ID 5JAZ). The cocrystallized ligand is rendered as green sticks. The *O,O* motif of the designed ligand overlays well with the hydroxamate MBG of the cocrystallized ligand.

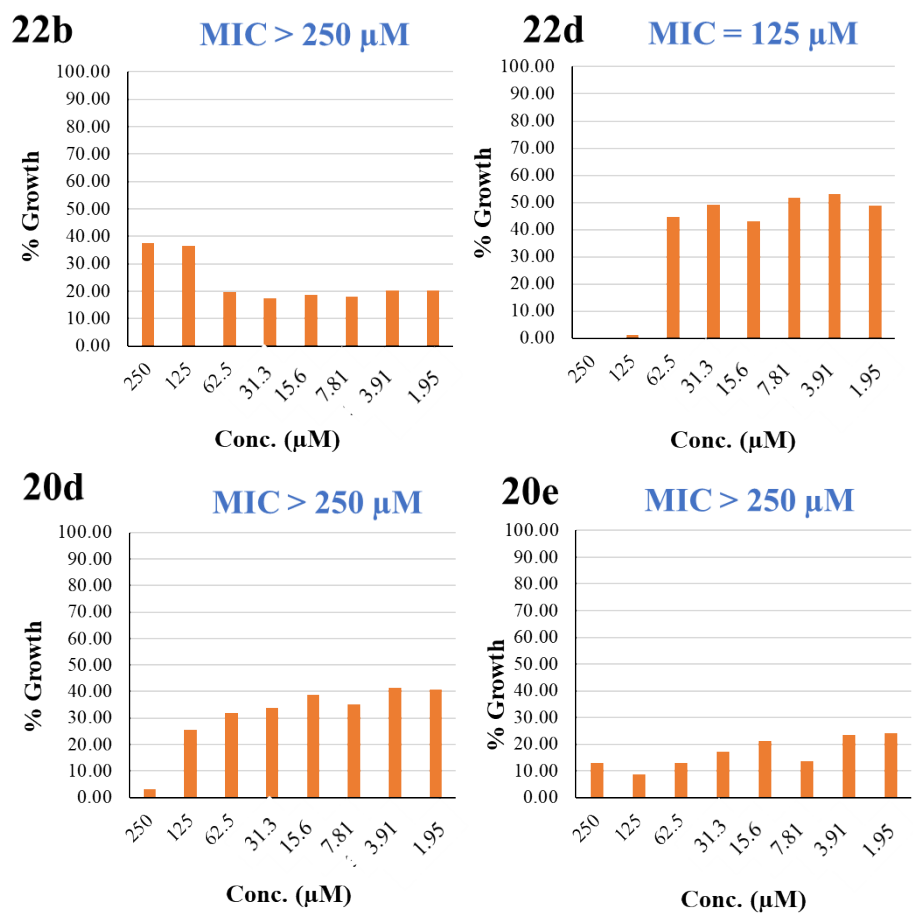

**Figure S6.** The MIC determination of selective compounds against *M. tuberculosis* using Alamar Blue Assay)

**Table S1:** Metal chelators and their properties (calculated using DataWarrior)

| <b>Code</b> | <b>MW</b> | <b>clogP</b> | <b>clogS</b> | <b>HBD</b> | <b>HBA</b> | <b>Rotatable bonds</b> |
|-------------|-----------|--------------|--------------|------------|------------|------------------------|
| MCL01       | 123.1     | 0.2          | -0.86        | 3          | 1          | 1                      |
| MCL02       | 137.1     | 0.6          | -1.23        | 3          | 1          | 1                      |
| MCL03       | 139.1     | -0.28        | -3.24        | 4          | 1          | 1                      |
| MCL04       | 167.1     | -0.32        | -0.87        | 5          | 2          | 2                      |
| MCL05       | 139.1     | -0.15        | -0.56        | 4          | 2          | 1                      |
| MCL06       | 139.1     | 0.03         | -1.09        | 4          | 2          | 1                      |
| MCL07       | 202       | 1.02         | -1.46        | 3          | 1          | 1                      |
| MCL08       | 167.1     | -0.26        | -0.9         | 5          | 2          | 2                      |
| MCL09       | 181.2     | 0.08         | -1.24        | 5          | 2          | 2                      |
| MCL10       | 167.1     | -0.32        | -0.87        | 5          | 2          | 2                      |
| MCL11       | 192       | 1.51         | -2.09        | 3          | 1          | 1                      |
| MCL12       | 179.2     | 1.87         | -1.9         | 3          | 1          | 4                      |
| MCL13       | 145.2     | 1.98         | -2.55        | 2          | 1          | 0                      |
| MCL14       | 189.2     | 1.17         | -2.06        | 4          | 2          | 1                      |
| MCL15       | 173.2     | 1.51         | -2.36        | 3          | 1          | 1                      |
| MCL16       | 173.2     | 1.39         | -2.46        | 3          | 1          | 1                      |
| MCL17       | 161.2     | 1.15         | -4.41        | 3          | 1          | 0                      |
| MCL18       | 144.2     | 1.3          | -2.4         | 2          | 1          | 0                      |
| MCL19       | 145.2     | 1.63         | -2.03        | 2          | 1          | 0                      |
| MCL20       | 159.2     | 2.03         | -2.39        | 2          | 1          | 0                      |
| MCL21       | 160.2     | 1.3          | -2.63        | 3          | 2          | 0                      |
| MCL22       | 222.3     | 1.02         | -3.41        | 4          | 1          | 1                      |
| MCL23       | 173.2     | 1.46         | -2.34        | 3          | 1          | 1                      |
| MCL24       | 179.6     | 2.24         | -2.76        | 2          | 1          | 0                      |
| MCL25       | 96.1      | 0.12         | -0.59        | 3          | 1          | 0                      |
| MCL26       | 126.1     | -0.53        | -1.79        | 5          | 3          | 0                      |
| MCL27       | 128.2     | 0.29         | -1.72        | 3          | 1          | 0                      |
| MCL28       | 128.2     | 0.16         | -1.46        | 3          | 1          | 0                      |
| MCL29       | 140.2     | 1.08         | -2.22        | 2          | 0          | 0                      |

|       |       |       |       |   |   |   |
|-------|-------|-------|-------|---|---|---|
| MCL30 | 140.1 | 0.87  | -1.53 | 4 | 2 | 0 |
| MCL31 | 142.2 | 0.68  | -2.08 | 3 | 1 | 0 |
| MCL32 | 144.2 | 0.29  | -1.95 | 4 | 2 | 0 |
| MCL33 | 135.1 | -0.35 | -2.27 | 5 | 2 | 0 |
| MCL34 | 126.1 | 0.34  | -0.7  | 4 | 2 | 0 |
| MCL35 | 124.1 | 0.73  | -0.84 | 3 | 1 | 0 |
| MCL36 | 126.1 | 0.52  | -1.18 | 4 | 2 | 0 |
| MCL37 | 112.1 | -0.86 | -1.29 | 3 | 1 | 0 |
| MCL38 | 128.2 | -0.8  | -0.28 | 2 | 1 | 0 |
| MCL39 | 126.1 | -0.19 | -1.55 | 3 | 1 | 0 |
| MCL40 | 126.1 | -0.19 | -1.55 | 3 | 1 | 0 |
| MCL41 | 142.2 | -0.13 | -0.54 | 2 | 1 | 0 |
| MCL42 | 140.1 | 0.27  | -1.82 | 3 | 1 | 1 |
| MCL43 | 142.1 | -1.11 | -1.04 | 4 | 2 | 1 |
| MCL44 | 160.6 | 0.04  | -1.95 | 3 | 1 | 1 |
| MCL45 | 174.6 | 0.71  | -2.21 | 3 | 1 | 1 |
| MCL46 | 156.1 | -0.44 | -1.3  | 4 | 2 | 1 |
| MCL47 | 170.1 | -1.02 | -1.15 | 5 | 2 | 1 |
| MCL48 | 112.1 | -0.72 | -1.17 | 3 | 1 | 0 |
| MCL49 | 111.1 | -1.02 | -0.88 | 3 | 1 | 0 |
| MCL50 | 127.2 | -0.81 | -1.82 | 2 | 1 | 0 |
| MCL51 | 153.2 | 0.38  | -1.32 | 3 | 1 | 1 |
| MCL52 | 167.2 | 0.78  | -1.62 | 3 | 1 | 2 |
| MCL53 | 153.2 | 0.33  | -1.35 | 3 | 1 | 1 |
| MCL54 | 111.1 | -0.86 | -1.03 | 3 | 2 | 0 |
| MCL55 | 155.2 | -0.02 | -0.04 | 2 | 1 | 0 |
| MCL56 | 125.1 | -0.61 | -0.67 | 3 | 1 | 0 |
| MCL57 | 141.2 | -0.39 | -1.61 | 2 | 1 | 0 |
| MCL58 | 155.1 | -1.63 | -0.61 | 5 | 2 | 1 |
| MCL59 | 183.3 | 0.84  | -0.61 | 2 | 1 | 2 |
| MCL60 | 169.3 | 0.39  | -0.34 | 2 | 1 | 1 |
| MCL61 | 138.1 | 0.8   | -1.33 | 3 | 2 | 1 |

|       |       |       |       |   |   |   |
|-------|-------|-------|-------|---|---|---|
| MCL62 | 137.1 | 0.4   | -1.41 | 3 | 2 | 1 |
| MCL63 | 152.2 | 1.14  | -1.68 | 3 | 2 | 1 |
| MCL64 | 152.2 | 1.14  | -1.68 | 3 | 2 | 1 |
| MCL65 | 152.2 | 1.14  | -1.68 | 3 | 2 | 1 |
| MCL66 | 153.1 | 0.12  | -1.41 | 4 | 3 | 1 |
| MCL67 | 180.2 | 1.99  | -2.2  | 3 | 2 | 2 |
| MCL68 | 154.1 | 0.45  | -1.04 | 4 | 3 | 1 |
| MCL69 | 154.1 | 0.45  | -1.04 | 4 | 3 | 1 |
| MCL70 | 154.1 | 0.45  | -1.04 | 4 | 3 | 1 |
| MCL71 | 156.1 | 0.9   | -1.65 | 3 | 2 | 1 |
| MCL72 | 156.1 | 0.9   | -1.65 | 3 | 2 | 1 |
| MCL73 | 75.1  | -0.81 | -0.73 | 3 | 2 | 0 |
| MCL74 | 111.1 | -0.08 | -0.68 | 3 | 2 | 1 |
| MCL75 | 199.3 | 0.54  | -1.27 | 3 | 1 | 4 |
| MCL76 | 129.2 | -1.7  | 0.12  | 3 | 3 | 0 |
| MCL77 | 174.2 | 0.94  | -2.77 | 3 | 1 | 0 |
| MCL78 | 216.2 | 0.3   | -1.26 | 4 | 2 | 3 |
| MCL79 | 180.2 | 2.29  | -3.03 | 2 | 0 | 0 |
| MCL80 | 110.1 | 0.97  | -1.02 | 2 | 2 | 0 |
| MCL81 | 124.1 | 1.24  | -1.34 | 2 | 1 | 1 |
| MCL82 | 140.2 | 1.53  | -2.74 | 1 | 0 | 1 |
| MCL83 | 122.1 | 0.36  | -1.32 | 2 | 1 | 0 |
| MCL84 | 164.2 | 1.47  | -1.87 | 2 | 1 | 1 |
| MCL85 | 160.2 | 2.16  | -2.63 | 2 | 2 | 0 |
| MCL86 | 154.1 | 0.45  | -1.04 | 4 | 3 | 1 |
| MCL87 | 153.1 | 0.12  | -1.41 | 4 | 3 | 1 |
| MCL88 | 154.1 | 0.45  | -1.04 | 4 | 3 | 1 |
| MCL89 | 211.2 | 2.97  | -4.31 | 3 | 1 | 1 |
| MCL90 | 227.3 | 3.15  | -2.88 | 2 | 1 | 1 |
| MCL91 | 171.2 | 0.77  | -1.86 | 3 | 1 | 1 |
| MCL92 | 100.1 | 0.23  | -1.1  | 2 | 0 | 2 |
| MCL93 | 114.1 | 0.45  | -1.26 | 2 | 0 | 2 |

|       |       |      |       |   |   |   |
|-------|-------|------|-------|---|---|---|
| MCL94 | 126.2 | 0.67 | -1.61 | 2 | 0 | 1 |
| MCL95 | 128.2 | 0.91 | -1.53 | 2 | 0 | 3 |
| MCL96 | 134.6 | 0.42 | -1.43 | 2 | 0 | 2 |

**Table S2:** Interactions shown by cocrystallized ligands at the binding site

| Code | PDB ID | Structures of cocrystallized ligands | RMSD | Docking score | Metal coordination distance | co-    |
|------|--------|--------------------------------------|------|---------------|-----------------------------|--------|
| CL1  | 5JAZ   |                                      | 0.37 | -10.7         | 2.20 Å                      | 2.23 Å |
| CL2  | 2Y1D   |                                      | 1.04 | -3.9          | 2.21 Å                      | 2.12 Å |
| CL3  | 3R0I   |                                      | 1.9  | -3.86         | 2.46 Å                      | 2.09 Å |

**Table S3:** Physicochemical Properties of the synthesized derivatives and fosmidomycin (**1**)

| Code             | Molecular formula                                                 | MW    | cLogP | HBA | HBD | RB | Basic nitrogen | TPSA  |
|------------------|-------------------------------------------------------------------|-------|-------|-----|-----|----|----------------|-------|
| FOS ( <b>1</b> ) | C <sub>4</sub> H <sub>10</sub> NO <sub>5</sub> P                  | 183.1 | -4.14 | 6   | 3   | 4  | 0              | 107.8 |
| <b>20a</b>       | C <sub>14</sub> H <sub>14</sub> NO <sub>5</sub> P                 | 307.2 | -0.99 | 6   | 4   | 4  | 0              | 116.7 |
| <b>20b</b>       | C <sub>8</sub> H <sub>10</sub> NO <sub>5</sub> P                  | 231.1 | -2.86 | 6   | 4   | 3  | 0              | 116.7 |
| <b>20e</b>       | C <sub>14</sub> H <sub>12</sub> NO <sub>5</sub> Cl <sub>2</sub> P | 376.1 | 0.22  | 6   | 4   | 4  | 0              | 116.7 |
| <b>20c</b>       | C <sub>9</sub> H <sub>12</sub> NO <sub>5</sub> P                  | 245.2 | -2.63 | 6   | 4   | 3  | 0              | 116.7 |
| <b>20d</b>       | C <sub>18</sub> H <sub>16</sub> NO <sub>5</sub> P                 | 357.3 | 0.21  | 6   | 4   | 4  | 0              | 116.7 |
| <b>21a</b>       | C <sub>14</sub> H <sub>14</sub> NO <sub>6</sub> P                 | 323.2 | -1.33 | 7   | 5   | 4  | 0              | 136.9 |
| <b>21b</b>       | C <sub>8</sub> H <sub>10</sub> NO <sub>6</sub> P                  | 247.1 | -3.21 | 7   | 5   | 3  | 0              | 136.9 |
| <b>21c</b>       | C <sub>9</sub> H <sub>12</sub> NO <sub>6</sub> P                  | 261.2 | -2.98 | 7   | 5   | 3  | 0              | 136.9 |
| <b>21d</b>       | C <sub>18</sub> H <sub>16</sub> NO <sub>6</sub> P                 | 373.3 | -0.14 | 7   | 5   | 4  | 0              | 136.9 |
| <b>22a</b>       | C <sub>18</sub> H <sub>16</sub> NO <sub>5</sub> P                 | 357.3 | 0.21  | 6   | 4   | 4  | 0              | 116.7 |
| <b>22b</b>       | C <sub>12</sub> H <sub>12</sub> NO <sub>5</sub> P                 | 281.2 | -1.67 | 6   | 4   | 3  | 0              | 116.7 |
| <b>22c</b>       | C <sub>13</sub> H <sub>14</sub> NO <sub>5</sub> P                 | 295.2 | -1.44 | 6   | 4   | 3  | 0              | 116.7 |
| <b>22d</b>       | C <sub>22</sub> H <sub>18</sub> NO <sub>5</sub> P                 | 407.4 | 1.4   | 6   | 4   | 4  | 0              | 116.7 |
| <b>28a</b>       | C <sub>14</sub> H <sub>16</sub> NO <sub>5</sub> P                 | 309.3 | -2.81 | 6   | 5   | 4  | 0              | 119.8 |
| <b>23a</b>       | C <sub>17</sub> H <sub>14</sub> NO <sub>6</sub> P                 | 359.3 | -1.21 | 7   | 3   | 4  | 1              | 122.7 |

**Table S4** Percentage inhibition or MIC values of compounds at 500  $\mu$ M against different pathogens. Kanamycin or Isoniazid (INH) were used as a positive control, and 5% DMSO was used as a negative control.

| ID         | <i>M. tuberculosis</i> | <i>E. coli</i> | <i>S. aureus</i> | <i>A. baumannii</i> | <i>K. Pneumoniae</i> | <i>S. typhimurium</i> | <i>V. cholerae</i> | <i>P. aeruginosa</i> |
|------------|------------------------|----------------|------------------|---------------------|----------------------|-----------------------|--------------------|----------------------|
| <b>20a</b> | NA*                    | NA             | NA               | NA                  | NA                   | NA                    | NA                 | NA                   |
| <b>22a</b> | NA*                    | NA             | NA               | NA                  | NA                   | NA                    | NA                 | NA                   |
| <b>21a</b> | NA*                    | NA             | NA               | NA                  | NA                   | NA                    | NA                 | NA                   |
| <b>23a</b> | NA*                    | NA             | NA               | NA                  | NA                   | NA                    | NA                 | NA                   |
| <b>28a</b> | NA*                    | NA             | NA               | NA                  | NA                   | NA                    | NA                 | NA                   |
| <b>20c</b> | NA                     | NA             | NA               | NA                  | NA                   | NA                    | NA                 | NA                   |



|                                                                            |                 |      |      |      |      |      |      |      |
|----------------------------------------------------------------------------|-----------------|------|------|------|------|------|------|------|
| <b>20e</b>                                                                 | MIC > 250<br>μM | NA   |
| <b>22b</b>                                                                 | MIC > 250<br>μM | NA   |
| <b>22c</b>                                                                 | NA              | NA   | NA   | NA   | NA   | NA   | NA   | NA   |
| <b>21d</b>                                                                 | NA              | NA   | NA   | NA   | NA   | NA   | NA   | NA   |
| <b>20d</b>                                                                 | MIC > 250<br>μM | NA   |
| <b>22d</b>                                                                 | MIC 125 μM      | NA   |
| <b>21b</b>                                                                 | NA              | NA   | NA   | NA   | NA   | NA   | NA   | NA   |
| <b>21c</b>                                                                 | NA              | NA   | NA   | NA   | NA   | NA   | NA   | NA   |
| Kana<br>mycin<br>(0.2<br>mg/m<br>L)                                        | NT              | 82 % | 82 % | 94 % | 10 % | 82 % | 86 % | 86 % |
| INH<br>(0.212<br>μM)                                                       | 44 %            | NT   |
| NA =<br>not<br>active;<br>NT =<br>not<br>tested<br>*tested<br>at 200<br>μM |                 |      |      |      |      |      |      |      |
|                                                                            |                 |      |      |      |      |      |      |      |

## IC<sub>50</sub> curves of the representative compounds

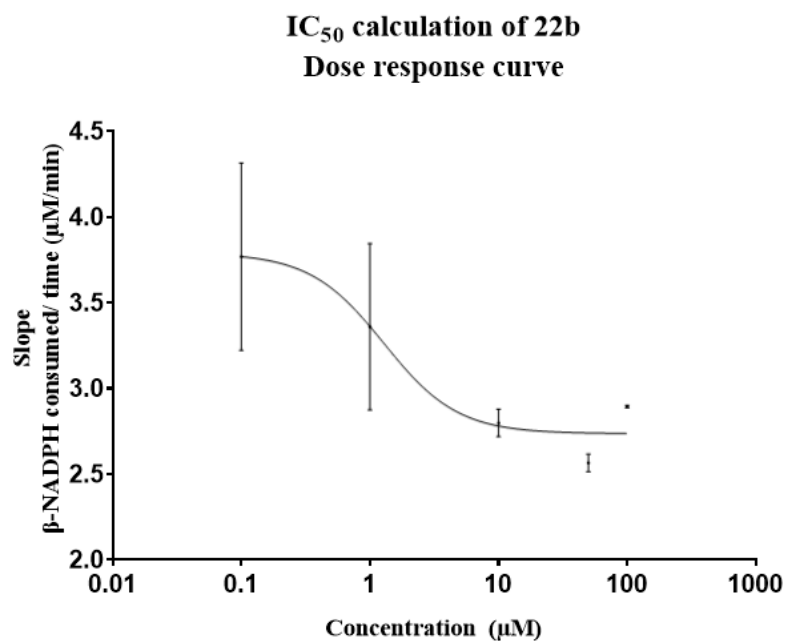

**Figure S7.** IC<sub>50</sub> curve for compound **22b**

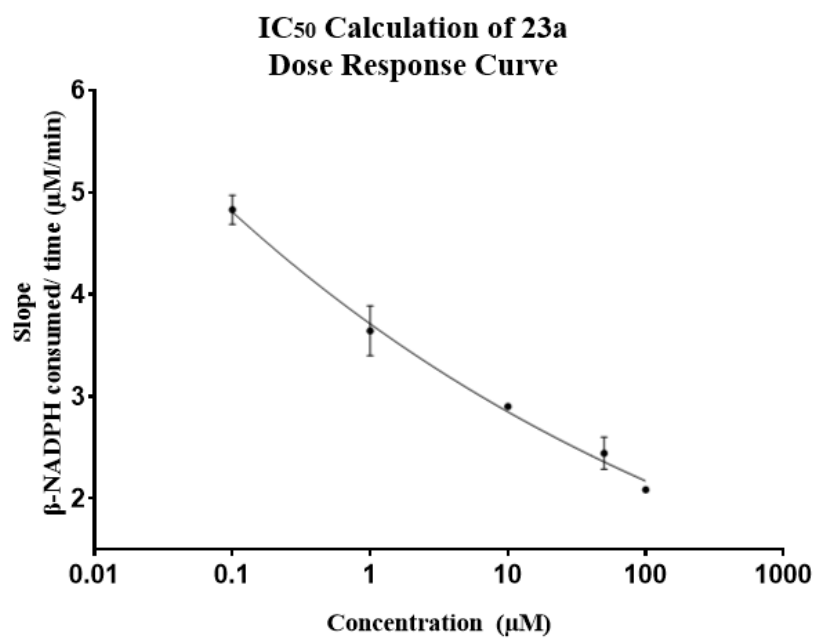

**Figure S8.** IC<sub>50</sub> curve for compound **23a**

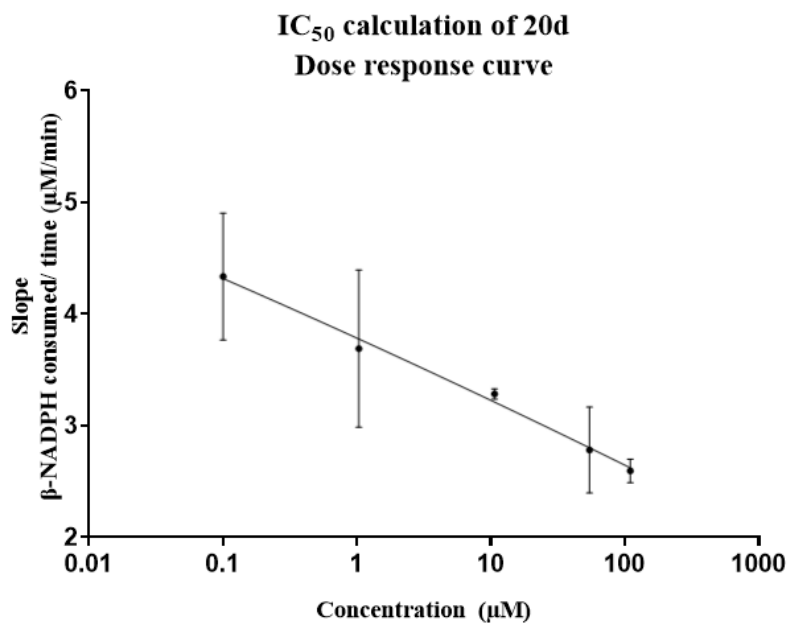

**Figure S9.** IC<sub>50</sub> curve for compound **20d**

## Spectral data for compounds

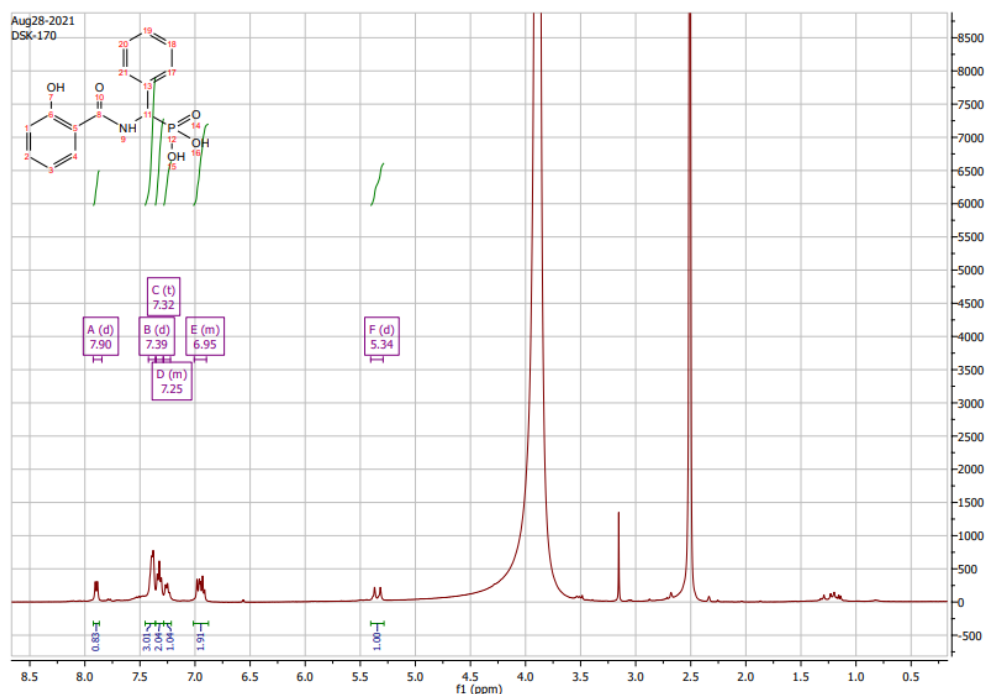

**Figure S10** <sup>1</sup>H NMR spectrum of **20a** in [D<sub>6</sub>]-DMSO (400 MHz, 300 K).

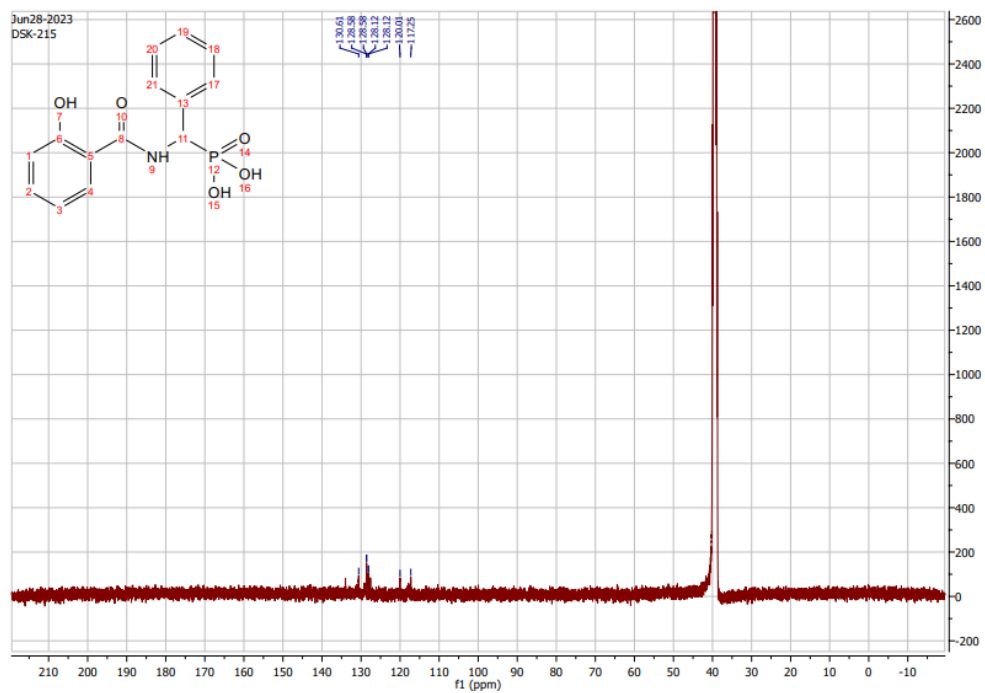

**Figure S11**  $^{13}\text{C}$  NMR spectrum of **20a** in  $[\text{D}_6]$ -DMSO (101 MHz, 300 K).

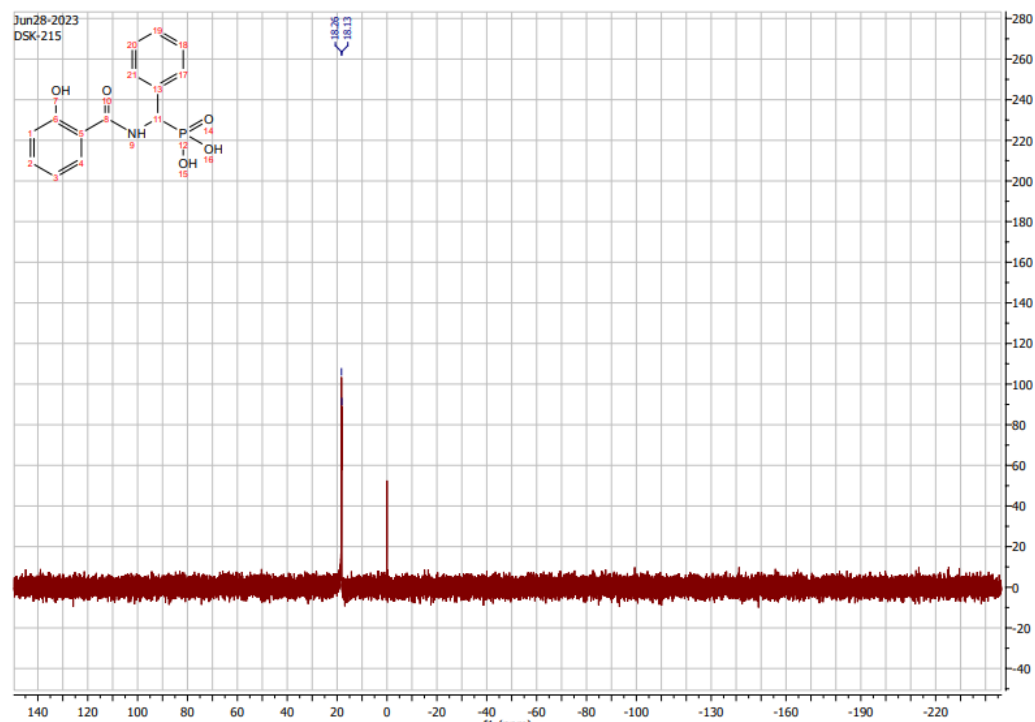

**Figure S12**  $^{31}\text{P}$  NMR spectrum of **20a** in  $[\text{D}_6]$ -DMSO (162 MHz, 300 K).

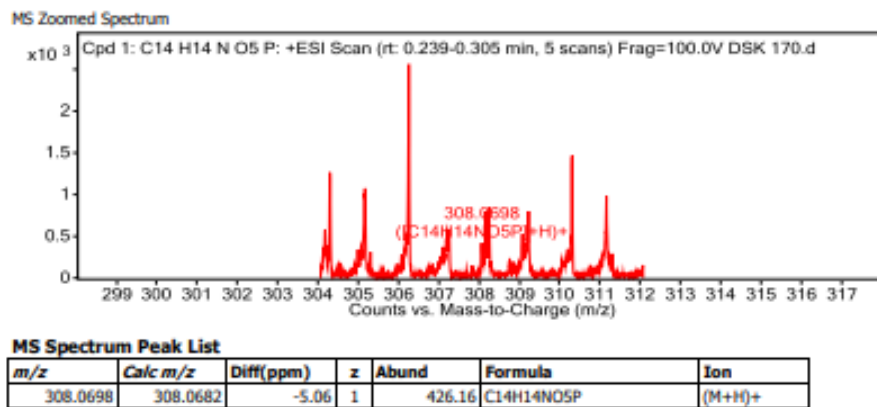

Figure S13. HRMS data for compound **20a**

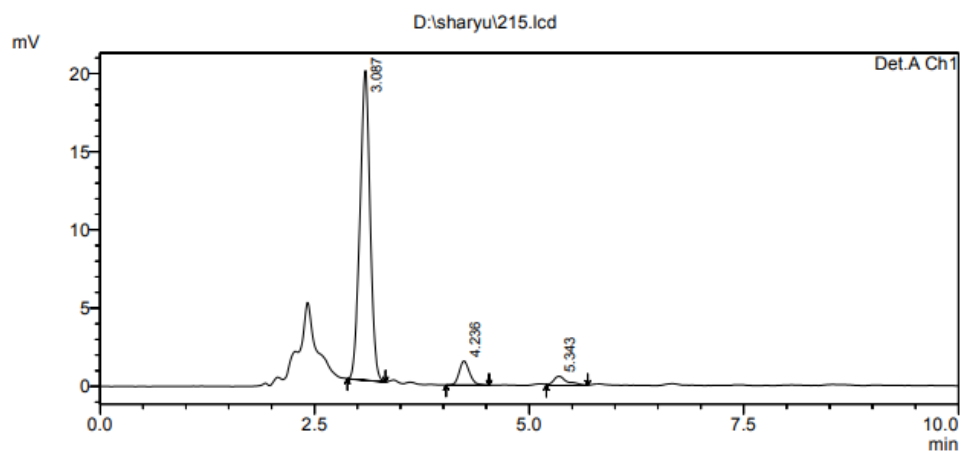

Figure S14. HPLC data for compound **20a**

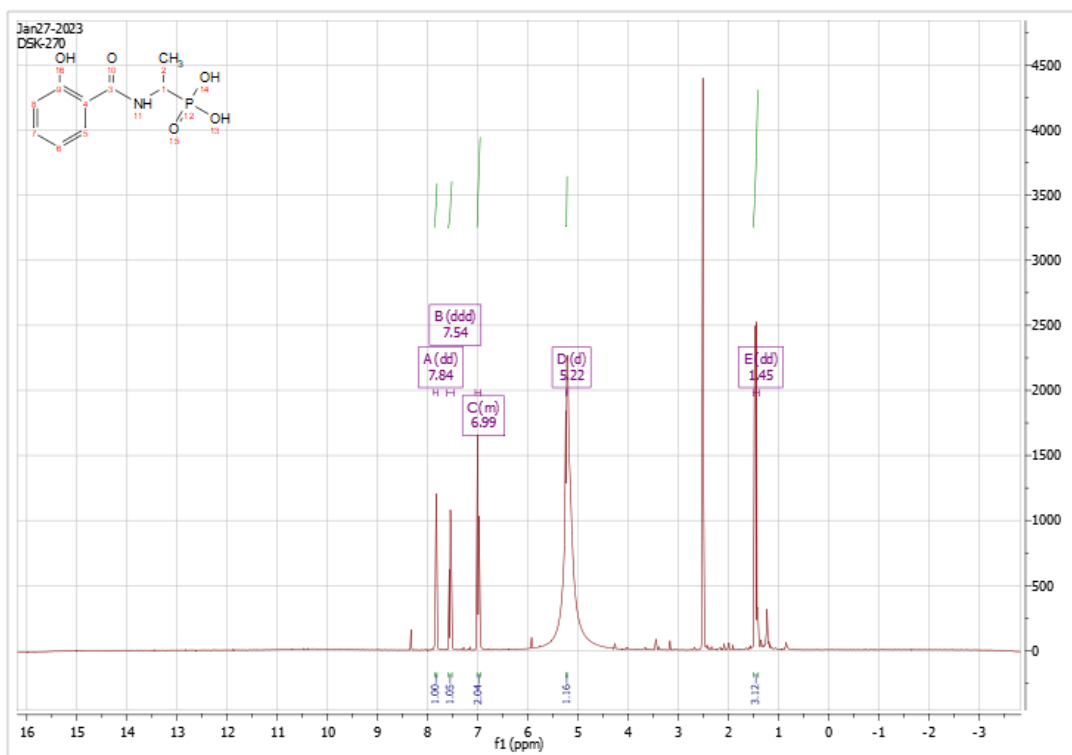

**Figure S15**  $^1\text{H}$  NMR spectrum of **20c** in  $[\text{D}_6]$ -DMSO (400 MHz, 300 K).

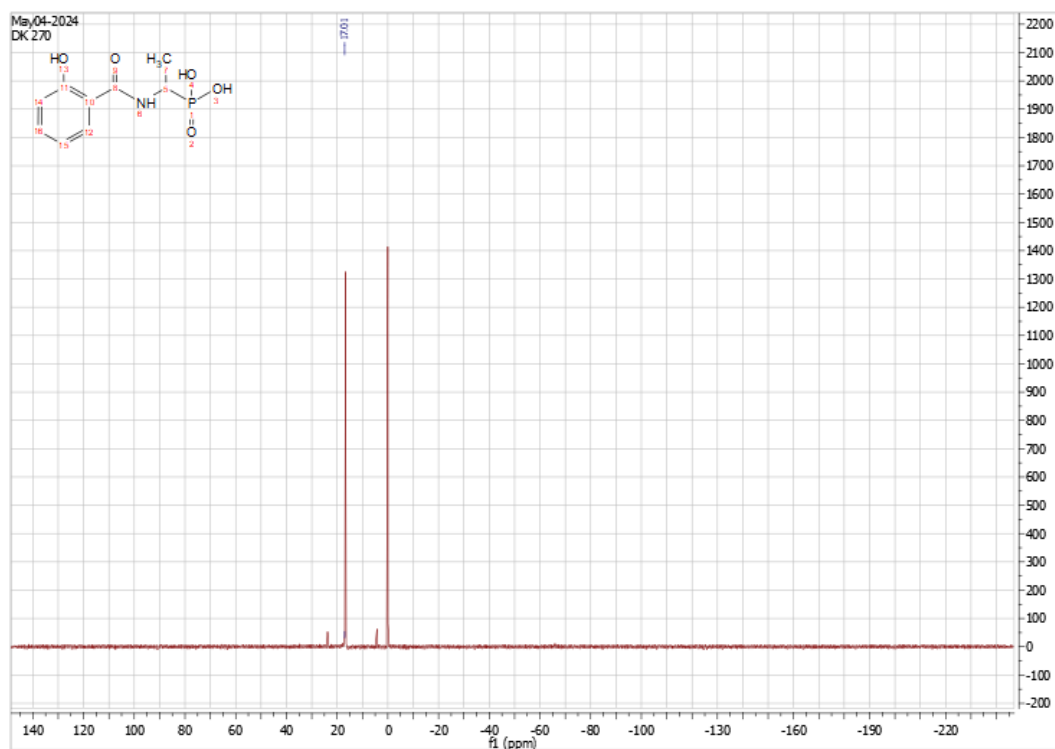

**Figure S16**  $^{31}\text{P}$  NMR spectrum of **20c** in  $[\text{D}_6]$ -DMSO (162 MHz, 300 K).

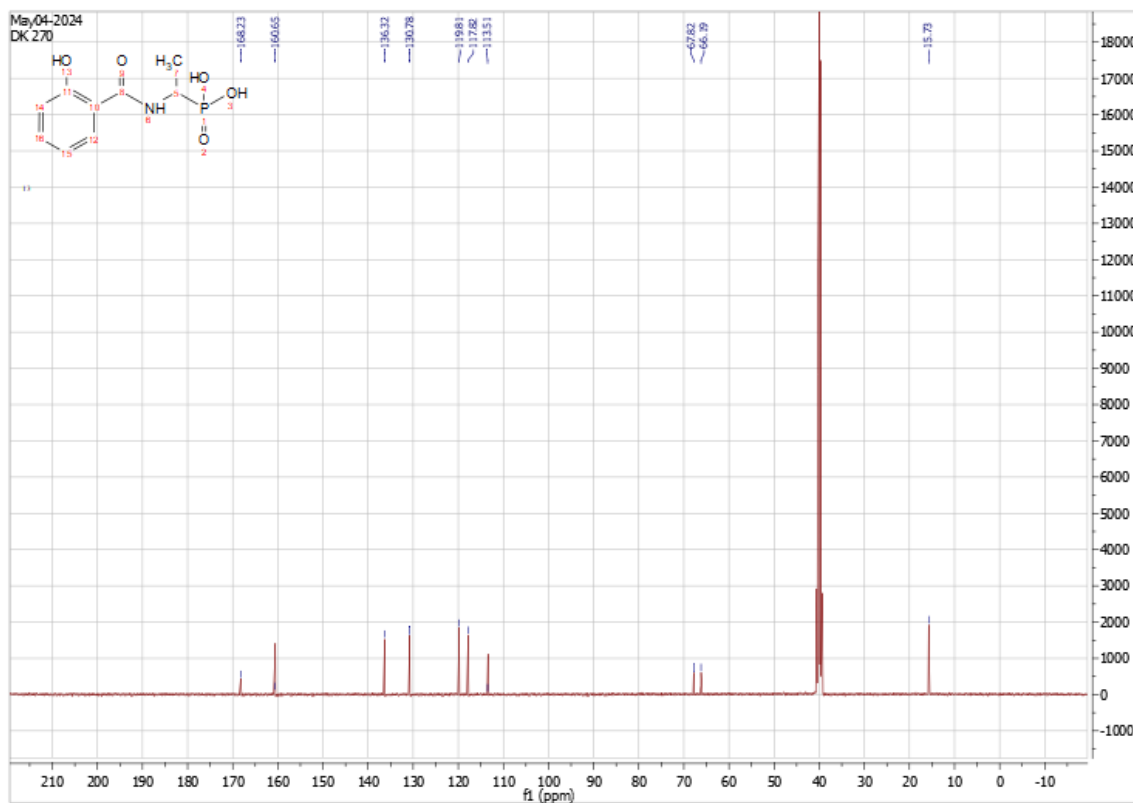

**Figure S17**  $^{13}\text{C}$  NMR spectrum of **20c** in  $[\text{D}_6]\text{-DMSO}$  (101 MHz, 300 K).

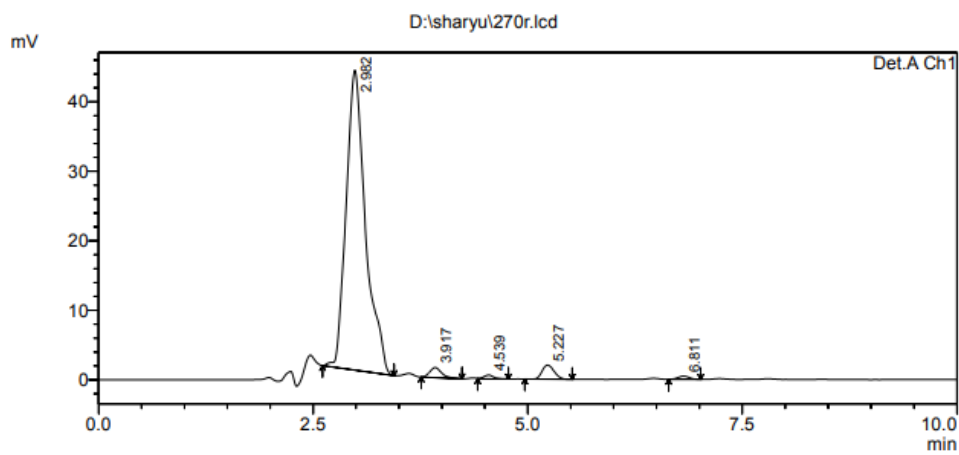

**Figure S18.** HPLC trace for compound **20c**

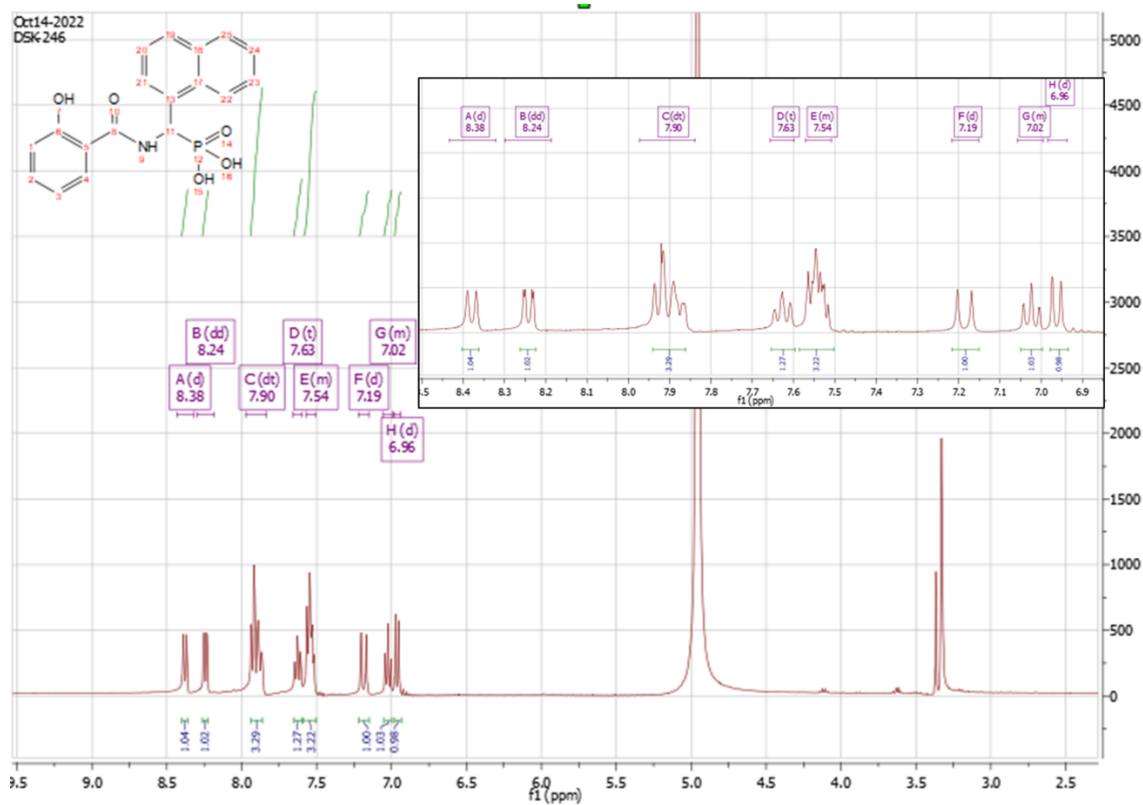

Figure S19 <sup>1</sup>H NMR spectrum of **20d** in [D<sub>6</sub>]-DMSO (400 MHz, 300 K).

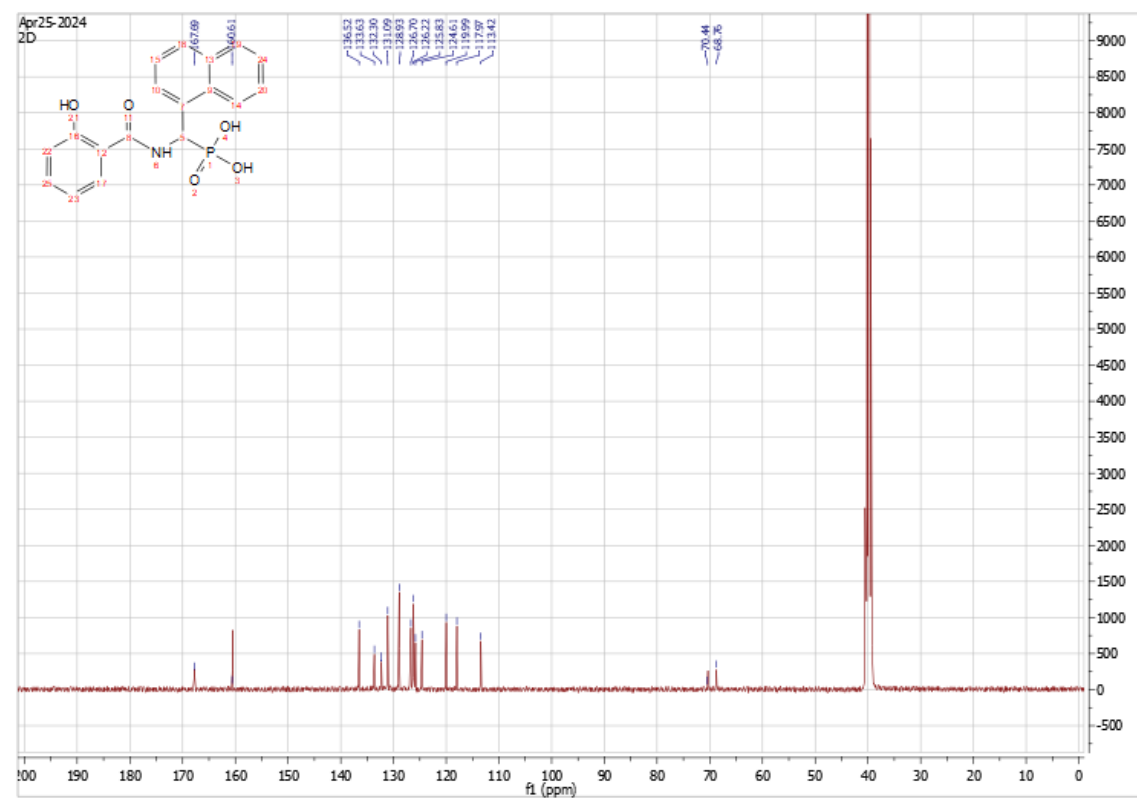



**Figure S20**  $^{13}\text{C}$  NMR spectrum of **20d** in  $[\text{D}_6]$ -DMSO (101 MHz, 300 K).

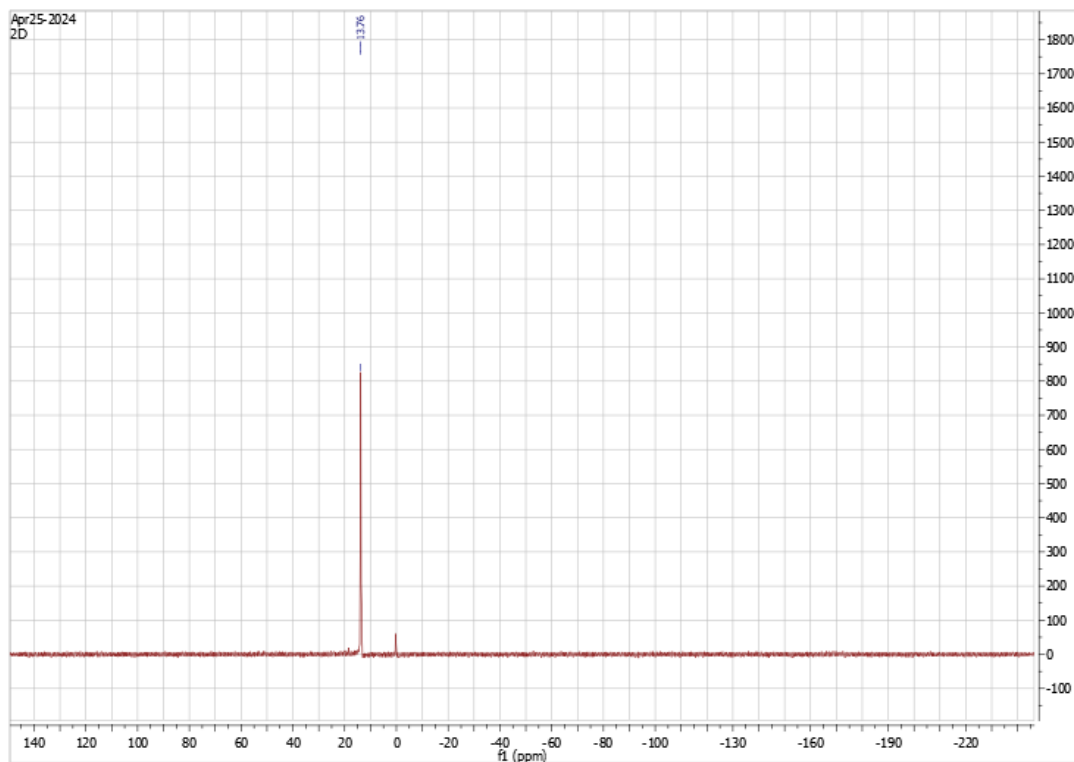

**Figure S21**  $^{31}\text{P}$  NMR spectrum of **20d** in  $[\text{D}_6]$ -DMSO (162 MHz, 300 K).

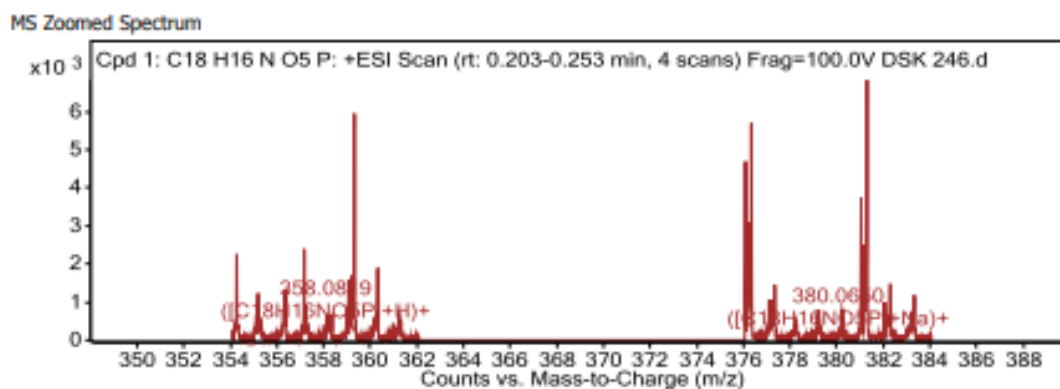

**MS Spectrum Peak List**

| m/z      | Calc m/z | Diff(ppm) | z | Abund  | Formula                                           | Ion                 |
|----------|----------|-----------|---|--------|---------------------------------------------------|---------------------|
| 358.0819 | 358.0839 | 5.45      | 1 | 418.71 | C <sub>18</sub> H <sub>16</sub> NO <sub>5</sub> P | (M+H) <sup>+</sup>  |
| 380.065  | 380.0658 | 2.18      | 1 | 221.61 | C <sub>18</sub> H <sub>16</sub> NO <sub>5</sub> P | (M+Na) <sup>+</sup> |

**Figure S22.** HRMS data for compound **20d**

<Chromatogram>

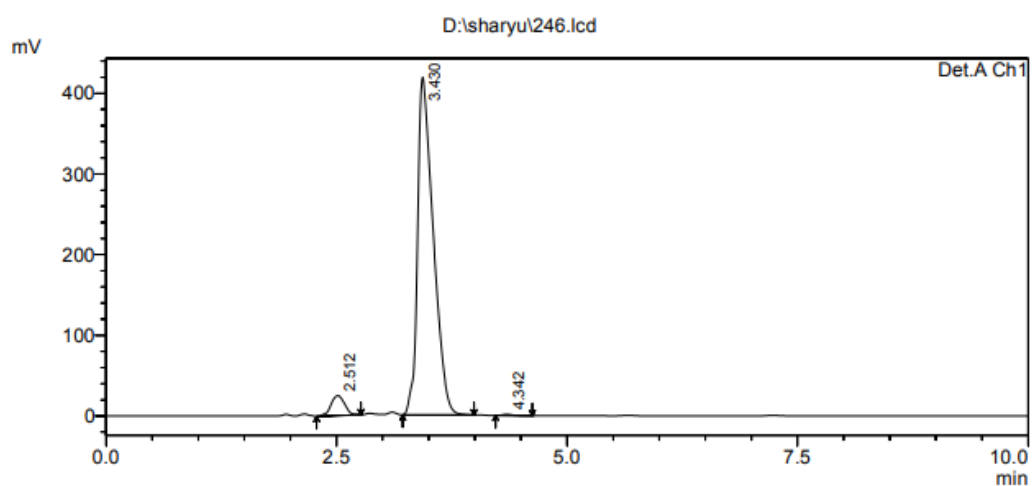

Figure S23. HPLC data for compound 20d

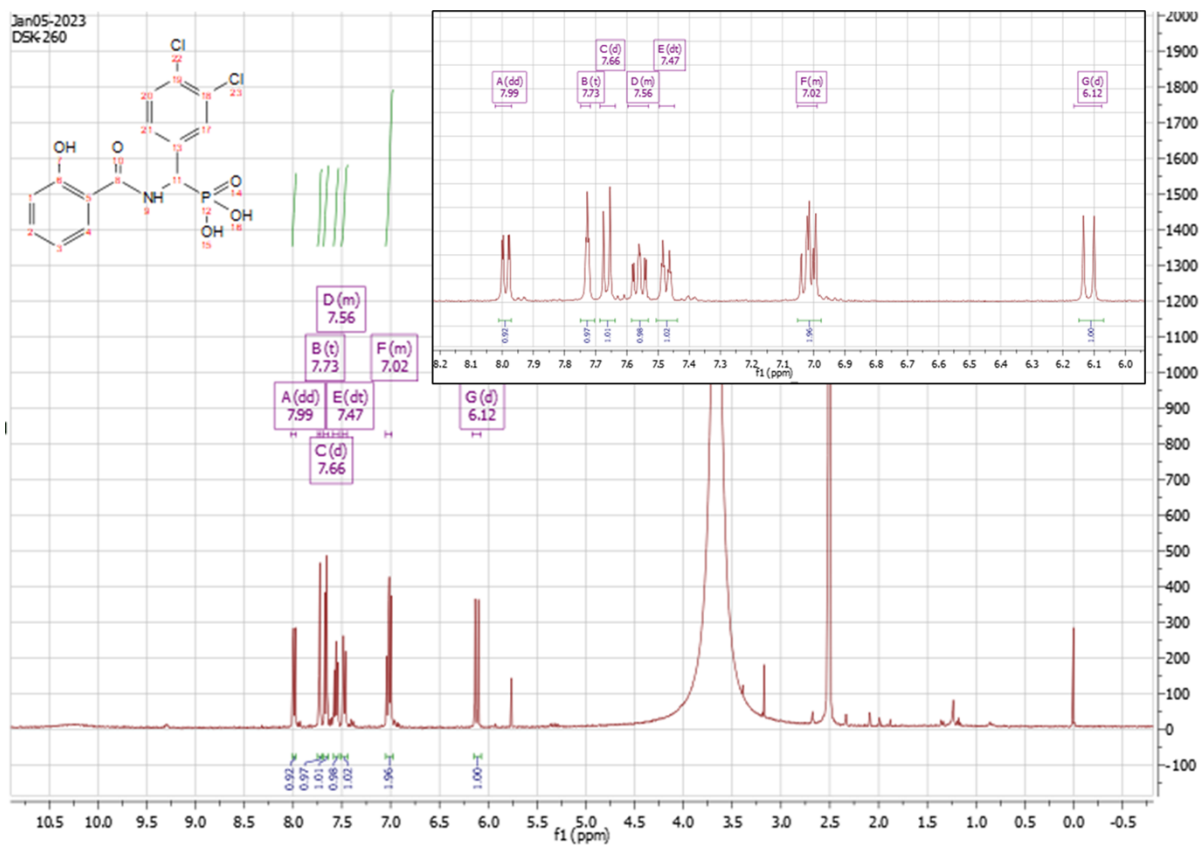

Figure S24 <sup>1</sup>H NMR spectrum of 20e in [D<sub>6</sub>]-DMSO (400 MHz, 300 K).

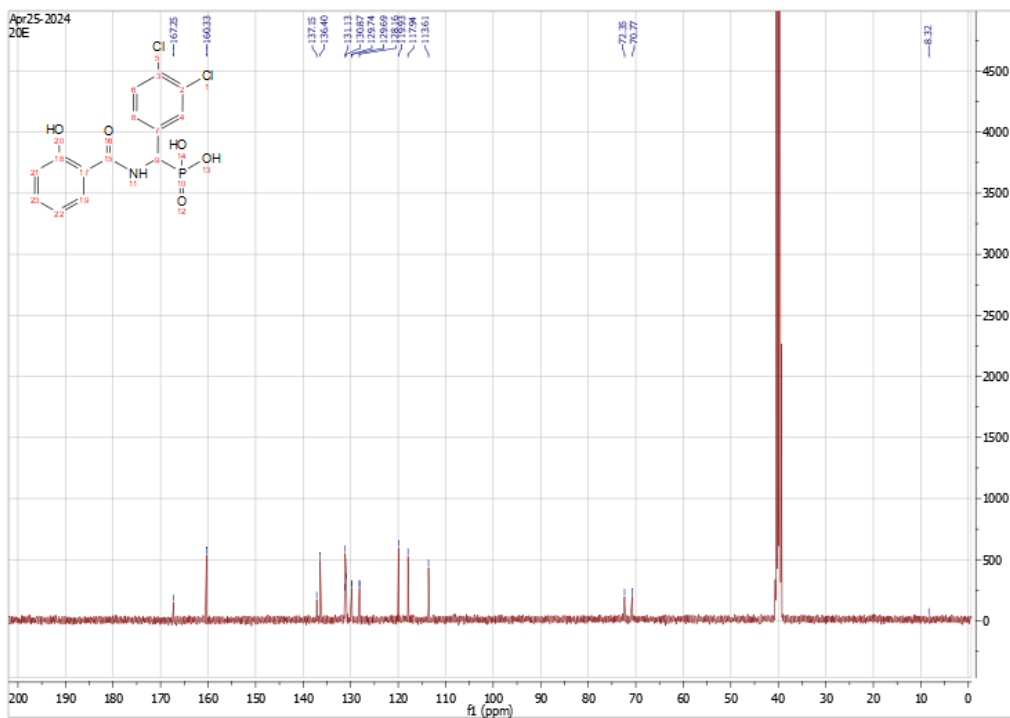

**Figure S25**  $^{13}\text{C}$  NMR spectrum of **20e** in  $[\text{D}_6]\text{-DMSO}$  (101 MHz, 300 K).

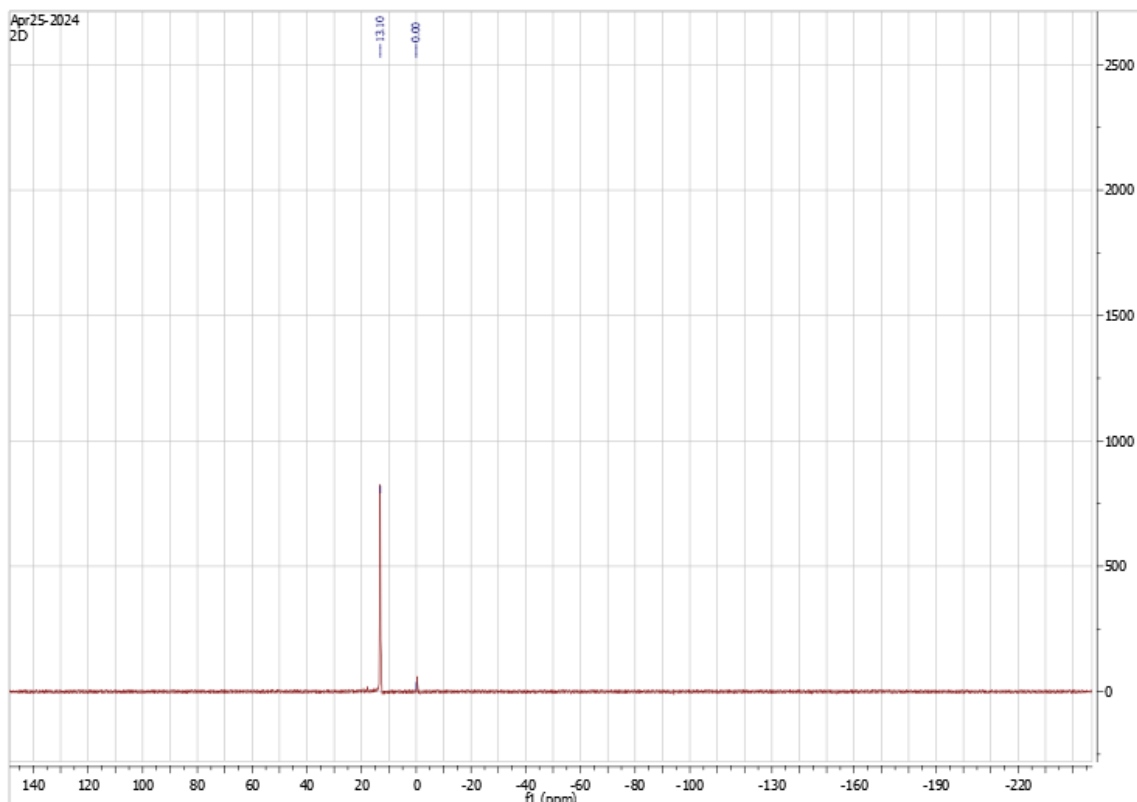

**Figure S26**  $^{31}\text{P}$  NMR spectrum of **20e** in  $[\text{D}_6]\text{-DMSO}$  (162 MHz, 300 K).

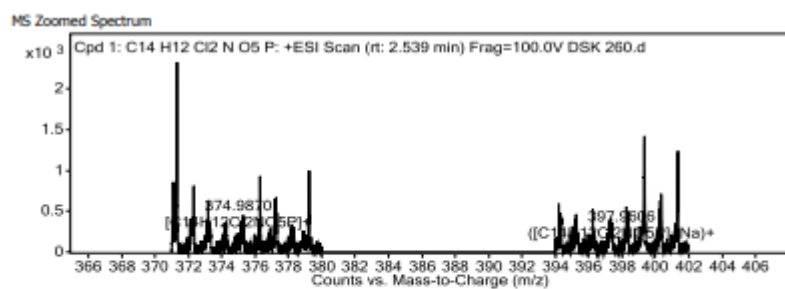

MS Spectrum Peak List

| m/z      | Calc m/z | Diff(ppm) | z | Abund  | Formula       | Ion     |
|----------|----------|-----------|---|--------|---------------|---------|
| 374.987  | 374.9825 | -12.17    | 1 | 247.63 | C14H12Cl2NO5P | M+      |
| 375.9873 | 375.9903 | 7.84      | 1 | 221.53 | C14H12Cl2NO5P | (M+H)+  |
| 397.9606 | 397.9722 | 29.31     | 1 | 115.34 | C14H12Cl2NO5P | (M+Na)+ |

Figure S27. HRMS data for compound 20e

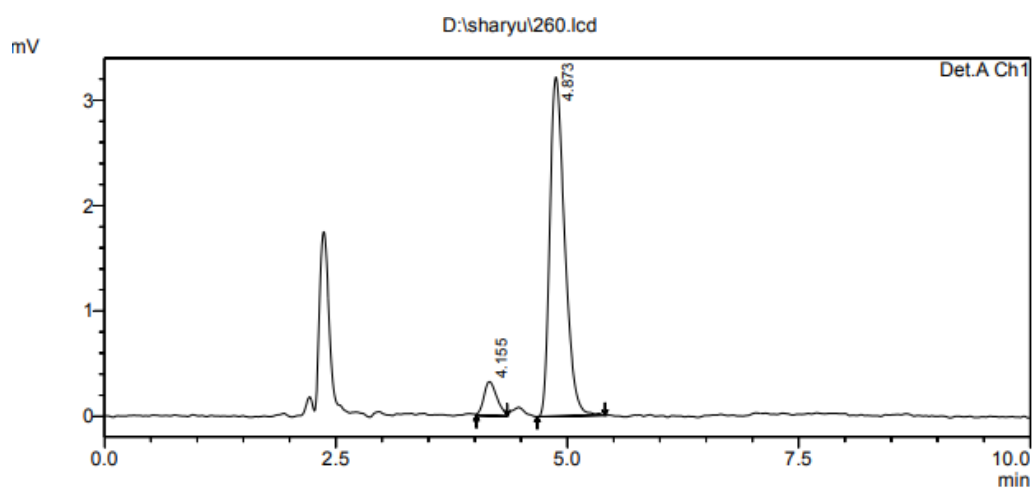

Figure S28. HPLC data for compound 20e

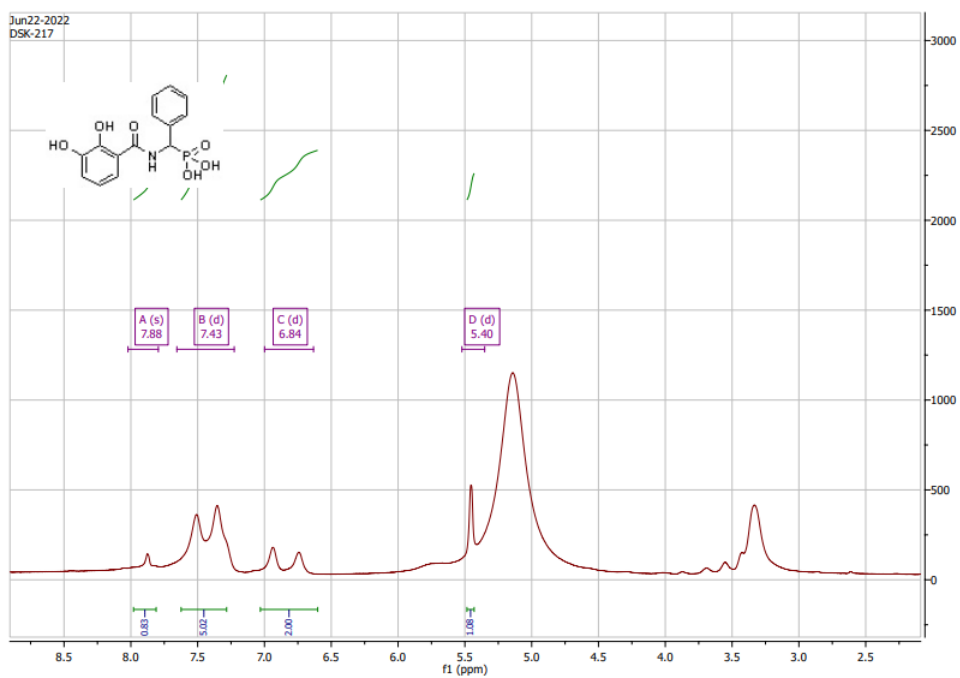

**Figure S29**  $^1\text{H}$  NMR spectrum of **21a** in  $[\text{D}_6]$ -DMSO (400 MHz, 300 K).

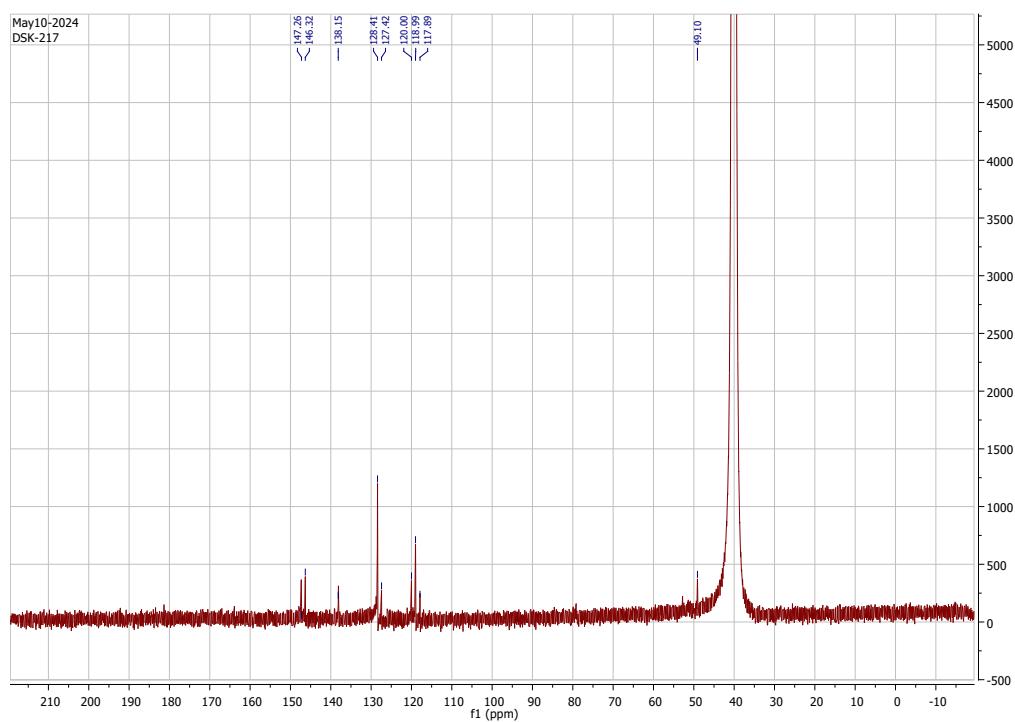

**Figure S30**  $^{13}\text{C}$  NMR spectrum of **21a** in  $[\text{D}_6]$ -DMSO (101 MHz, 300 K).

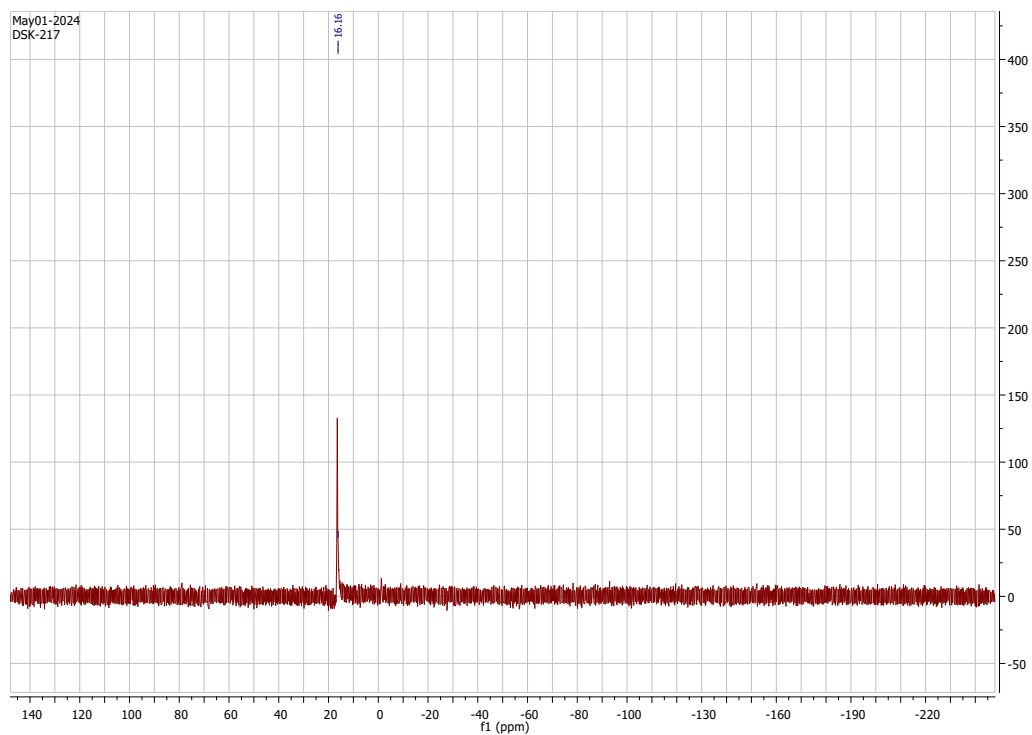

**Figure S31**  $^{31}\text{P}$  NMR spectrum of **21a** in  $[\text{D}_6]\text{-DMSO}$  (162 MHz, 300 K).

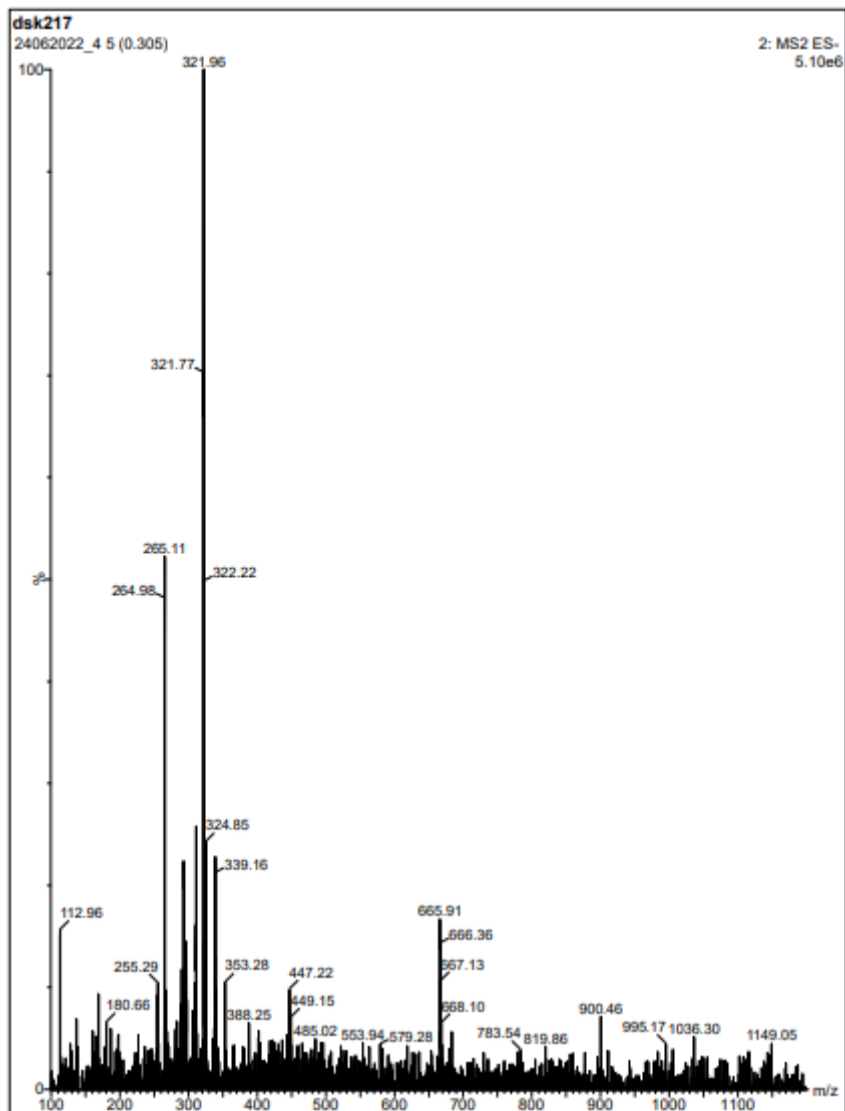

Figure S32. MS data for compound 21a

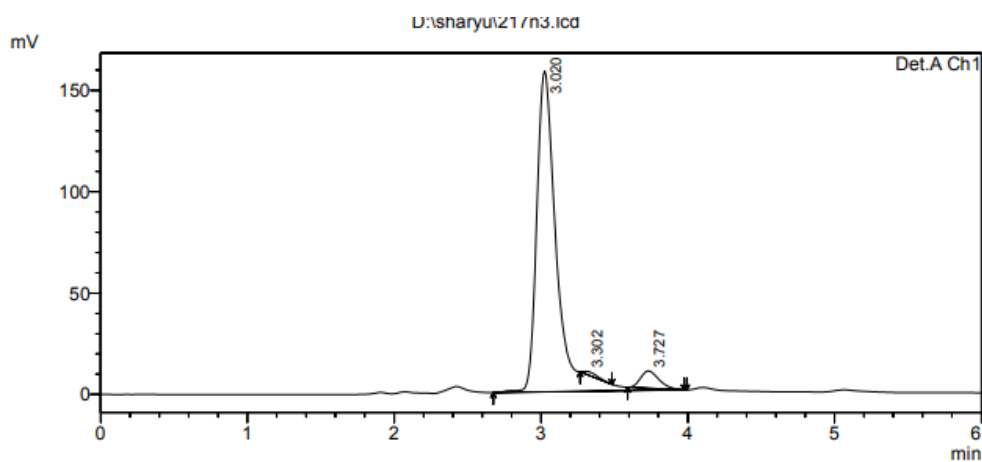

Figure S33. HPLC data for compound 21a

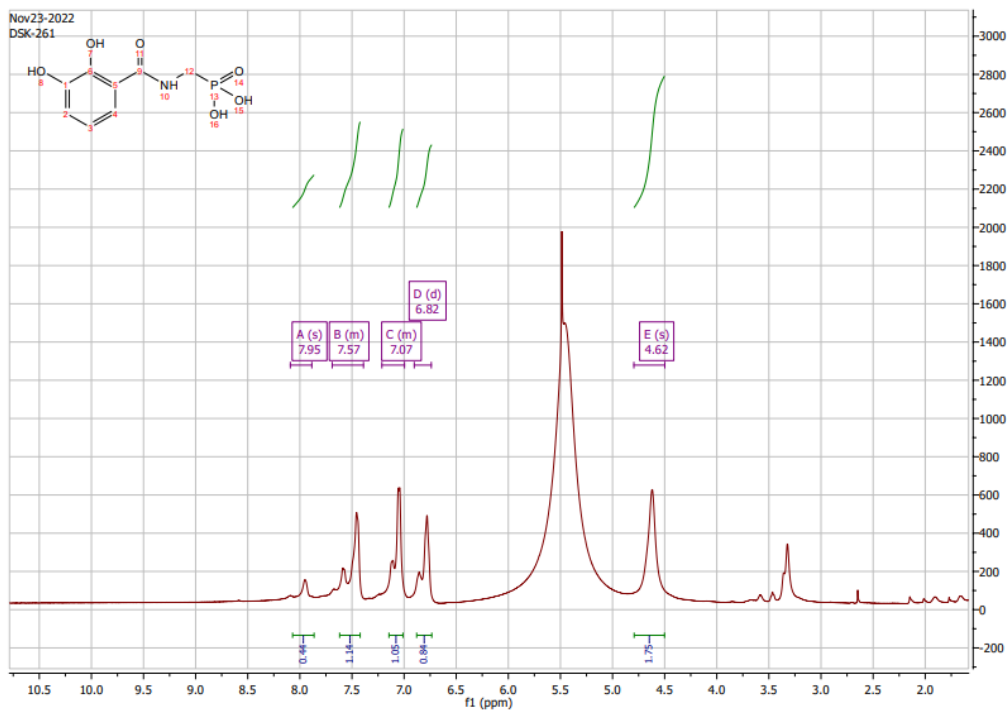

**Figure S34**  $^1\text{H}$  NMR spectrum of **21b** in  $[\text{D}_4]\text{-MeOD}$  (400 MHz, 300 K).

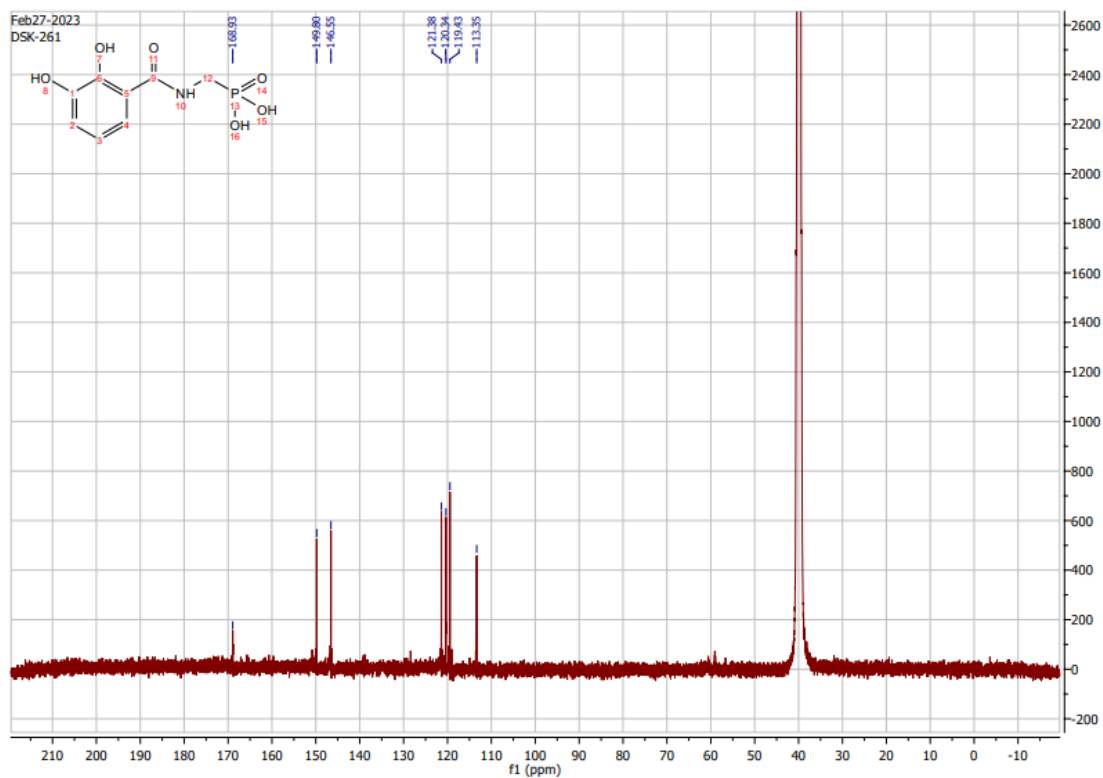

**Figure S35**  $^{13}\text{C}$  NMR spectrum of **21b** in  $[\text{D}_6]\text{-DMSO}$  (101 MHz, 300 K).



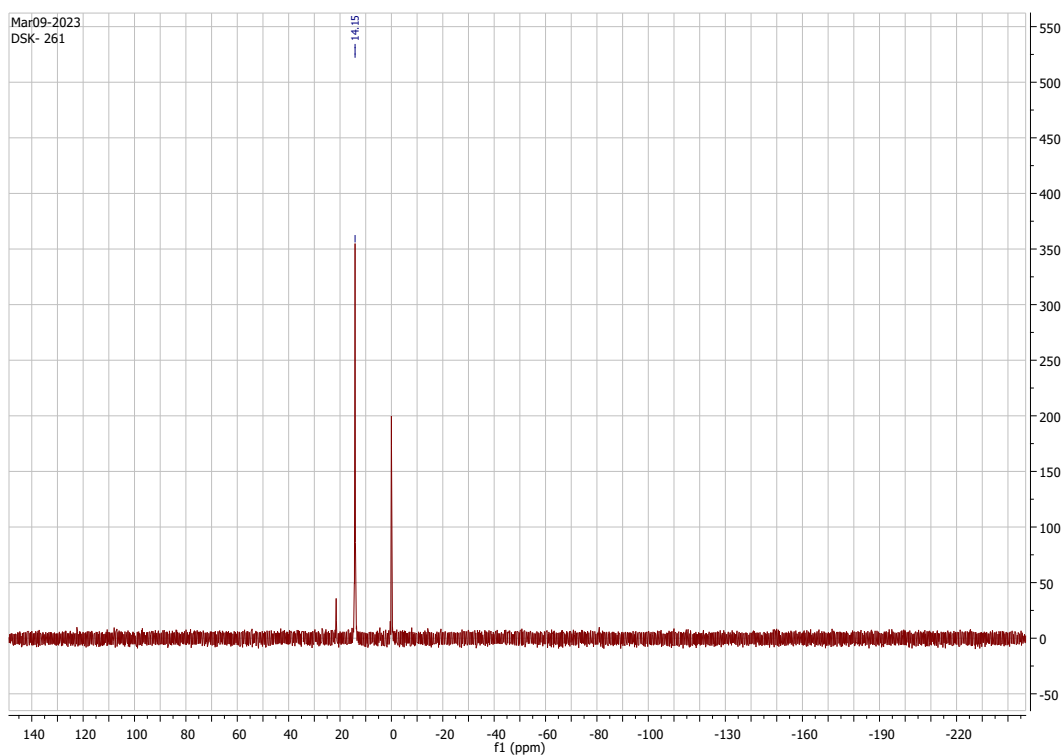

**Figure S36**  $^{31}\text{P}$  NMR spectrum of **21b** in  $[\text{D}_6]$ -DMSO (162 MHz, 300 K).

#### HPLC trace

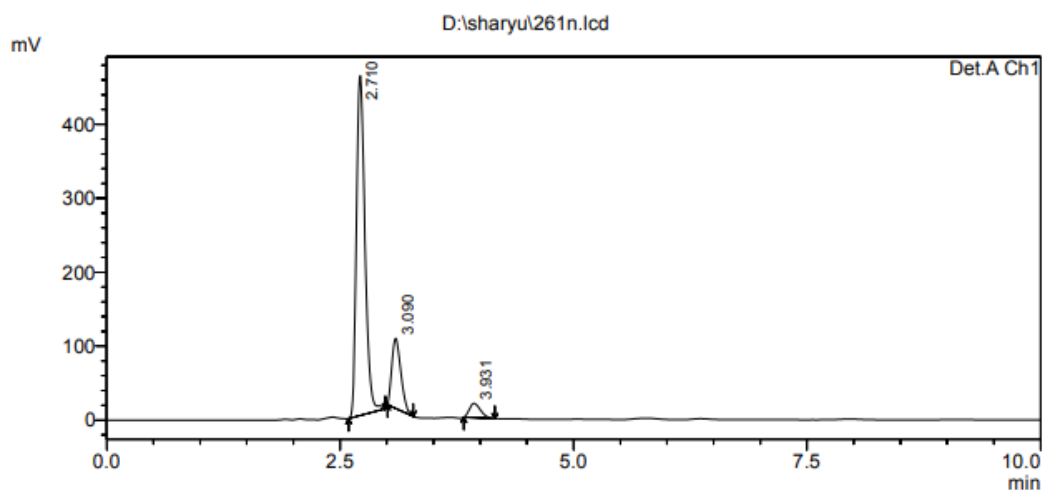

**Figure S37.** HPLC data for compound **21b**

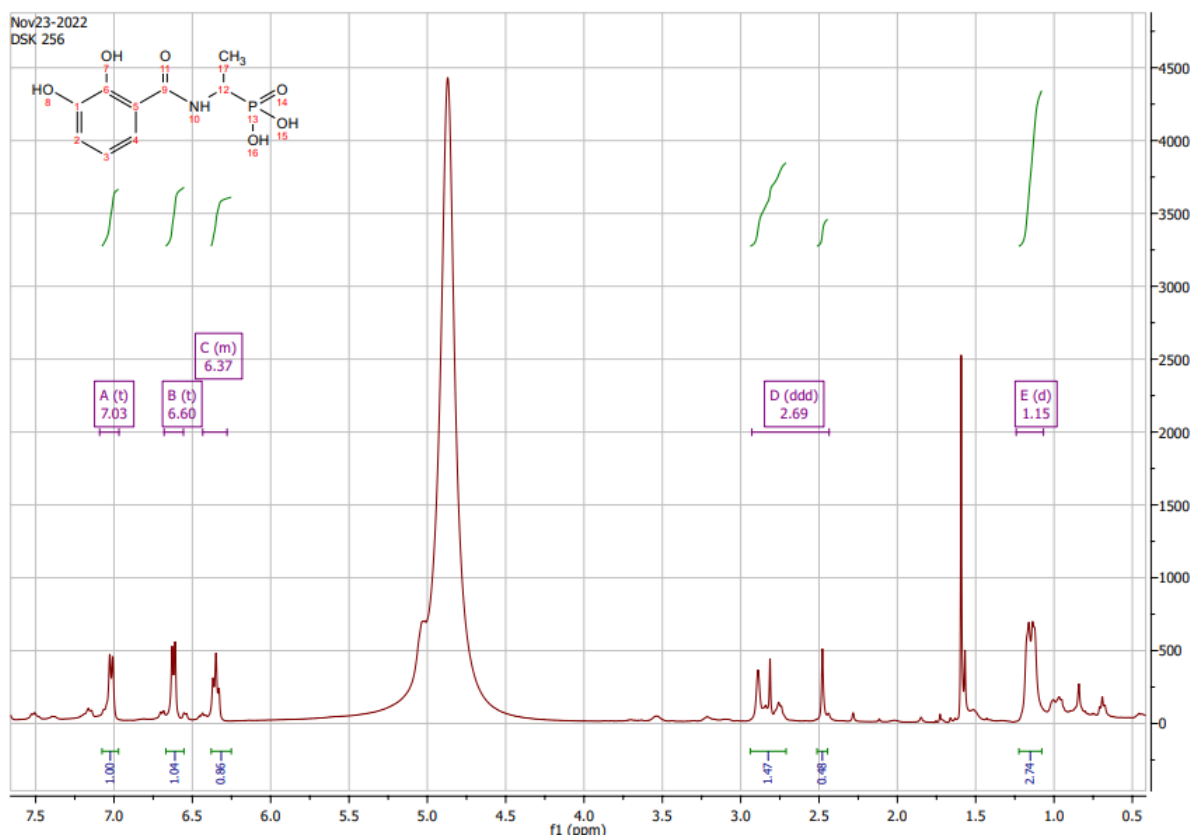

**Figure S38**  $^1\text{H}$  NMR spectrum of **21c** in  $[\text{D}_6]$ -DMSO (400 MHz, 300 K).

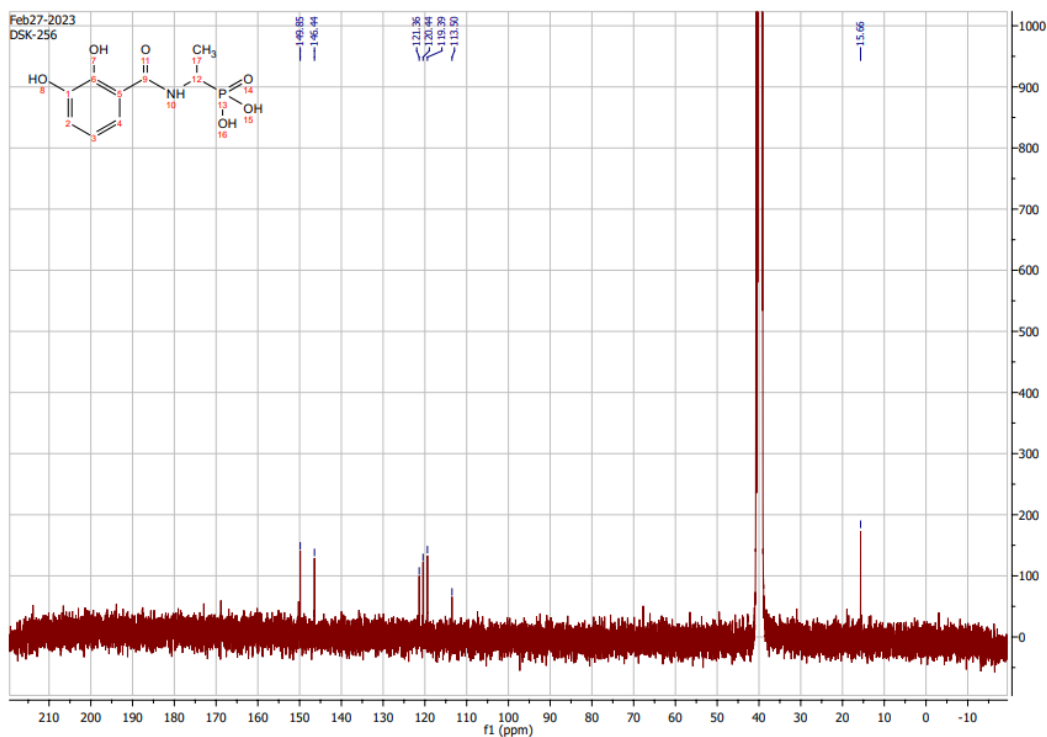

**Figure S39**  $^{13}\text{C}$  NMR spectrum of **21c** in  $[\text{D}_6]$ -DMSO (101 MHz, 300 K).

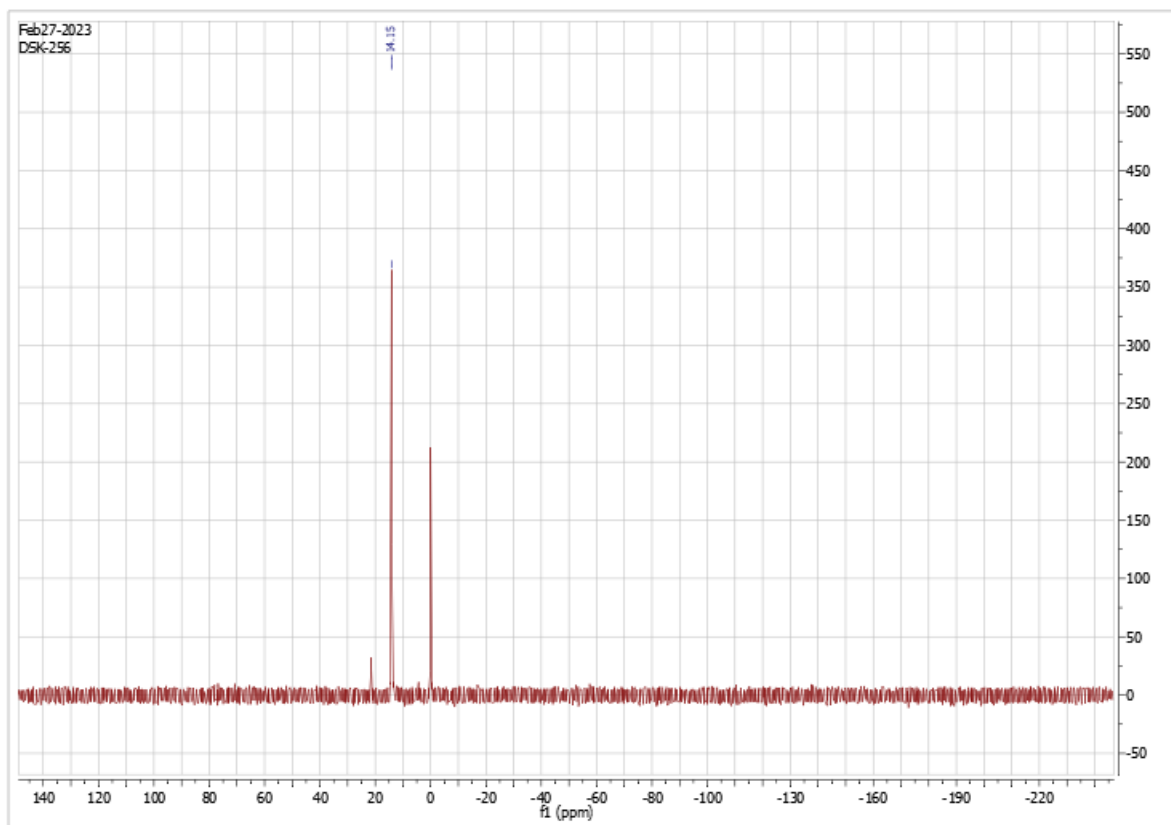

**Figure S40**  $^{31}\text{P}$  NMR spectrum of **21c** in  $[\text{D}_6]\text{-DMSO}$  (162 MHz, 300 K).

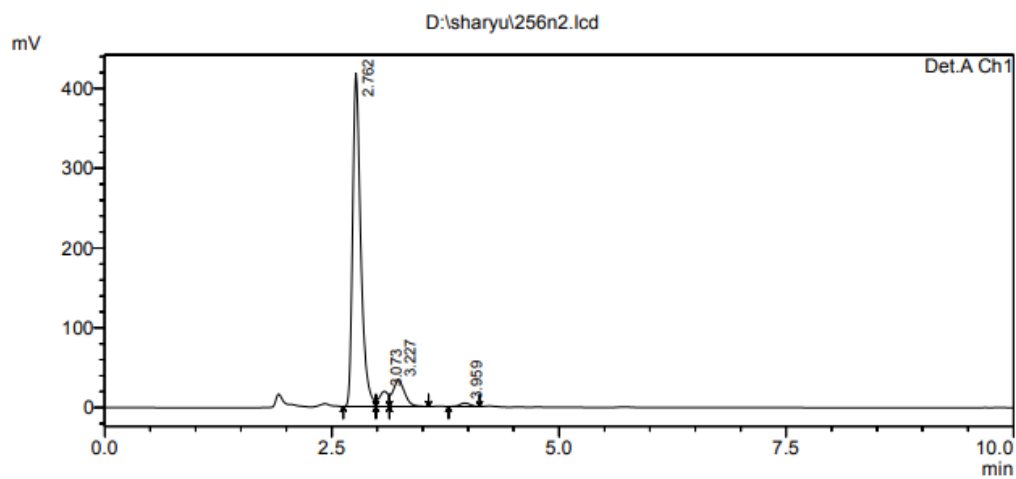

**Figure S41.** HPLC data for compound **21c**

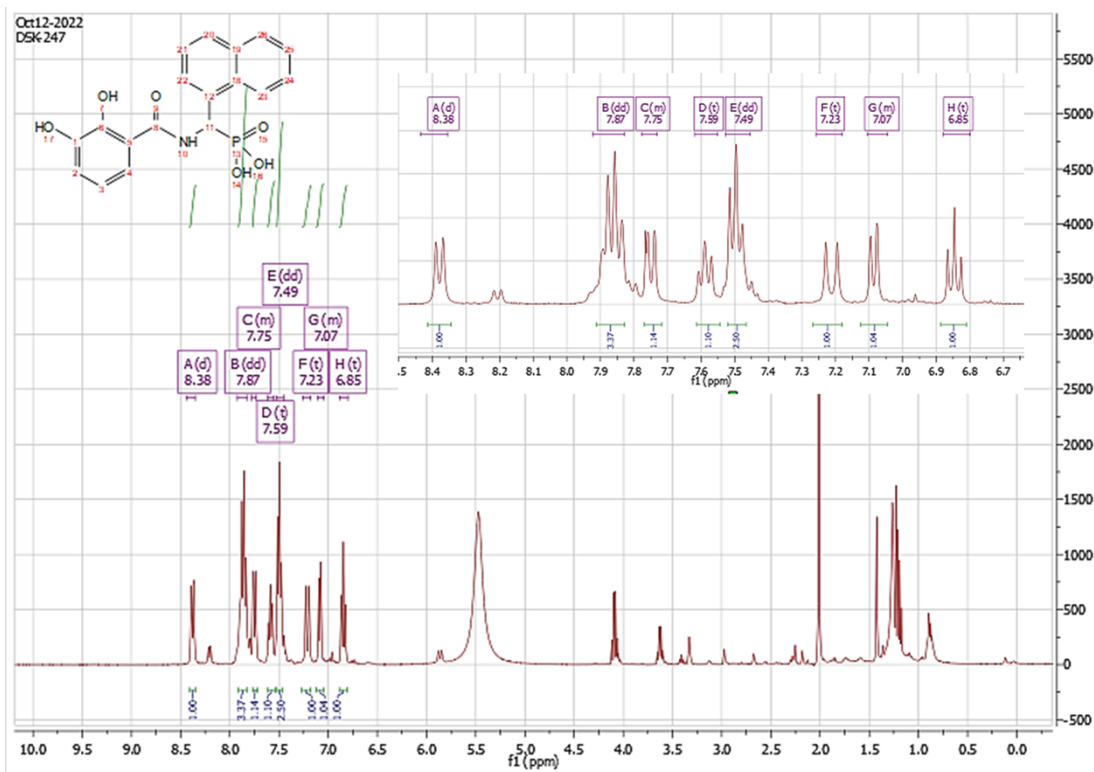

**Figure S42**  $^1\text{H}$  NMR spectrum of **21d** in  $[\text{D}_4]\text{-MeOD}$  (400 MHz, 300 K).

Some solvent peaks observed Peak at 5.49 (s, broad) DCM,

Ethanol  $\text{CH}_3$  (t) 1.19 and  $\text{CH}_2$  (q) 3.6

Ethyl acetate  $\text{CH}_3\text{CO}$  (s) 2.01,  $\text{CH}_2\text{CH}_3$  (q), 4.09 and  $\text{CH}_2\text{CH}_3$  (t), 1.24

n-Hexane  $\text{CH}_3$  t 0.90 and  $\text{CH}_2$  m 1.29

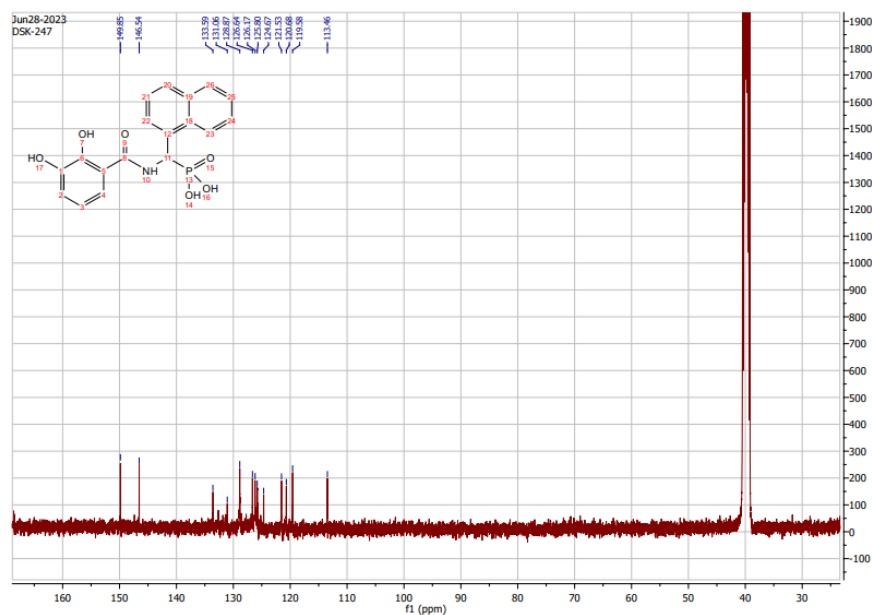

**Figure S43**  $^{13}\text{C}$  NMR spectrum of **21d** in  $[\text{D}_6]$ -DMSO (101 MHz, 300 K).

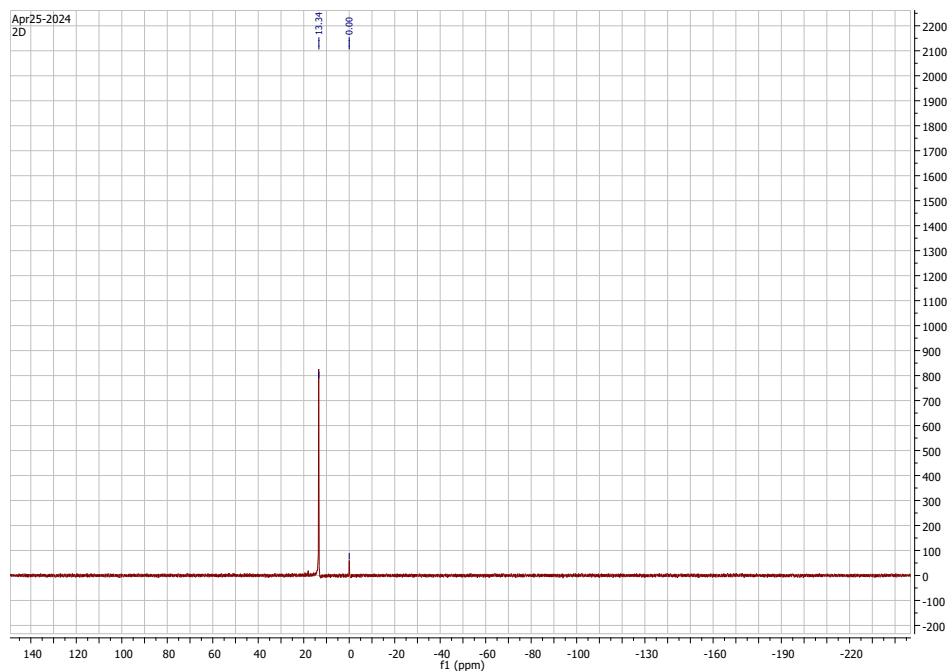

**Figure S44**  $^{31}\text{P}$  NMR spectrum of **21d** in  $[\text{D}_6]$ -DMSO (162 MHz, 300 K).

### HRMS

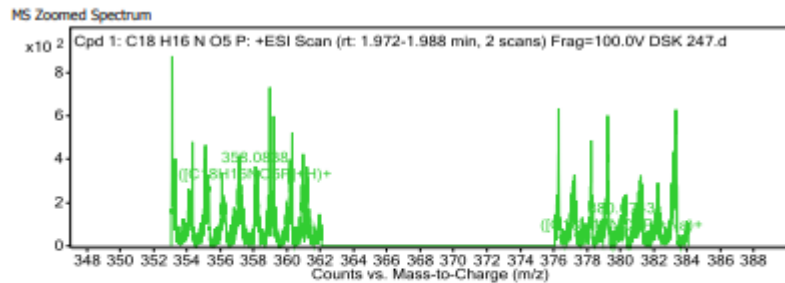

**MS Spectrum Peak List**

| m/z      | Calc m/z | Diff(ppm) | z | Abund  | Formula    | Ion     |
|----------|----------|-----------|---|--------|------------|---------|
| 357.0745 | 357.0761 | 4.3       | 1 | 287    | C18H16NO5P | M+      |
| 358.0838 | 358.0839 | 0.24      | 1 | 287.22 | C18H16NO5P | (M+H)+  |
| 380.0743 | 380.0658 | -22.27    | 1 | 53.67  | C18H16NO5P | (M+Na)+ |

**Figure S45.** HRMS data for compound **21d**

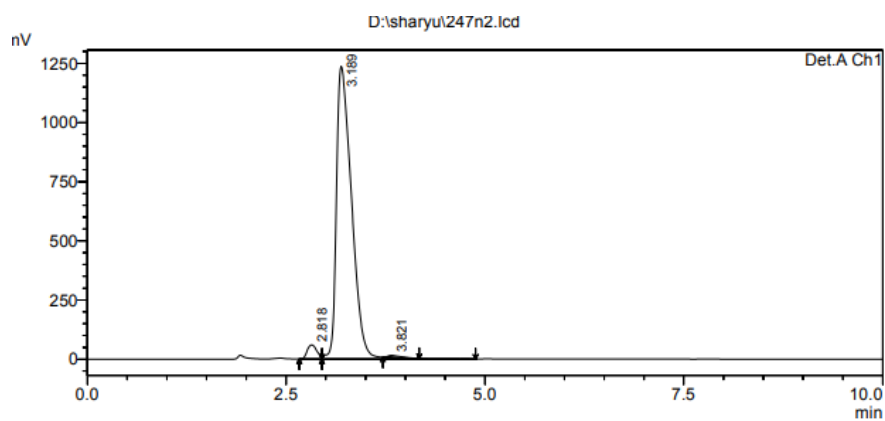

Figure S46. HPLC data for compound 21d

### Compound 22a

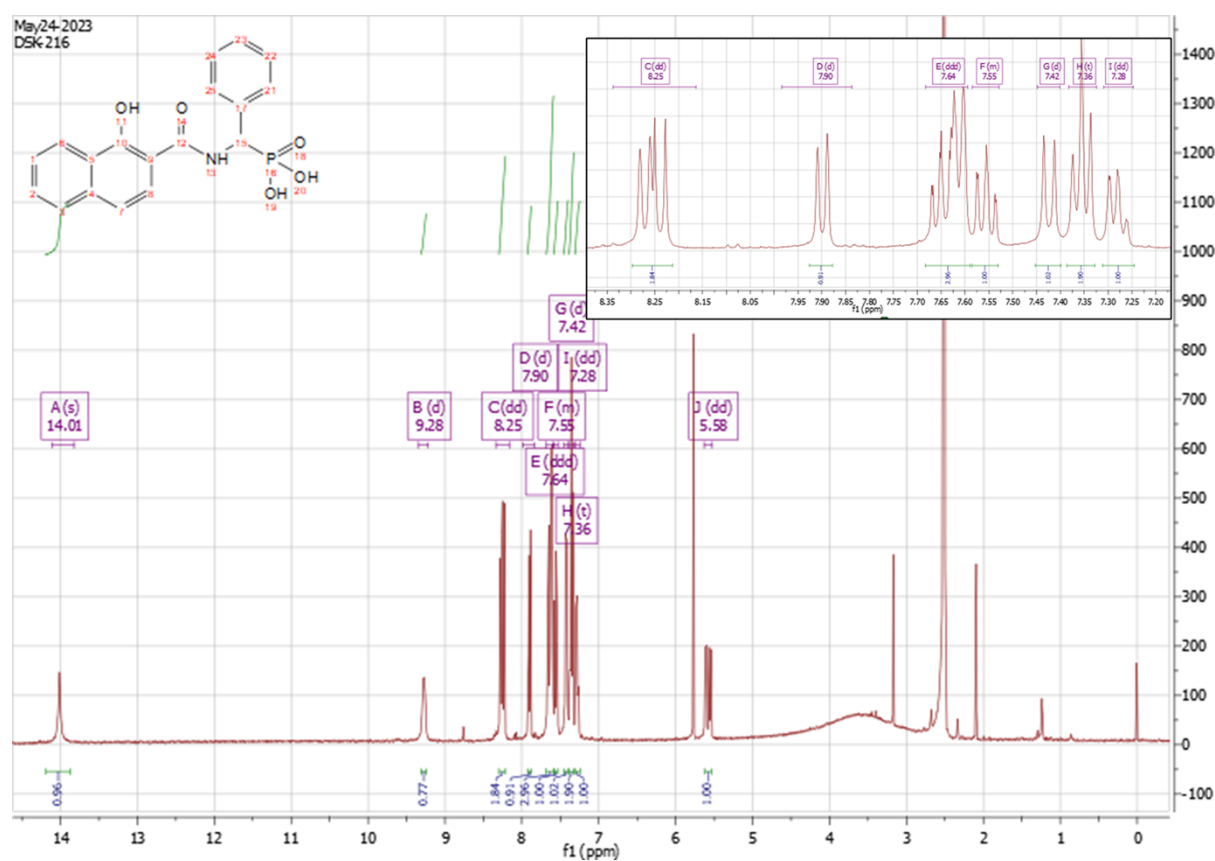

Figure S47 1H NMR spectrum of 22a in [D<sub>6</sub>]-DMSO (400 MHz, 300 K).

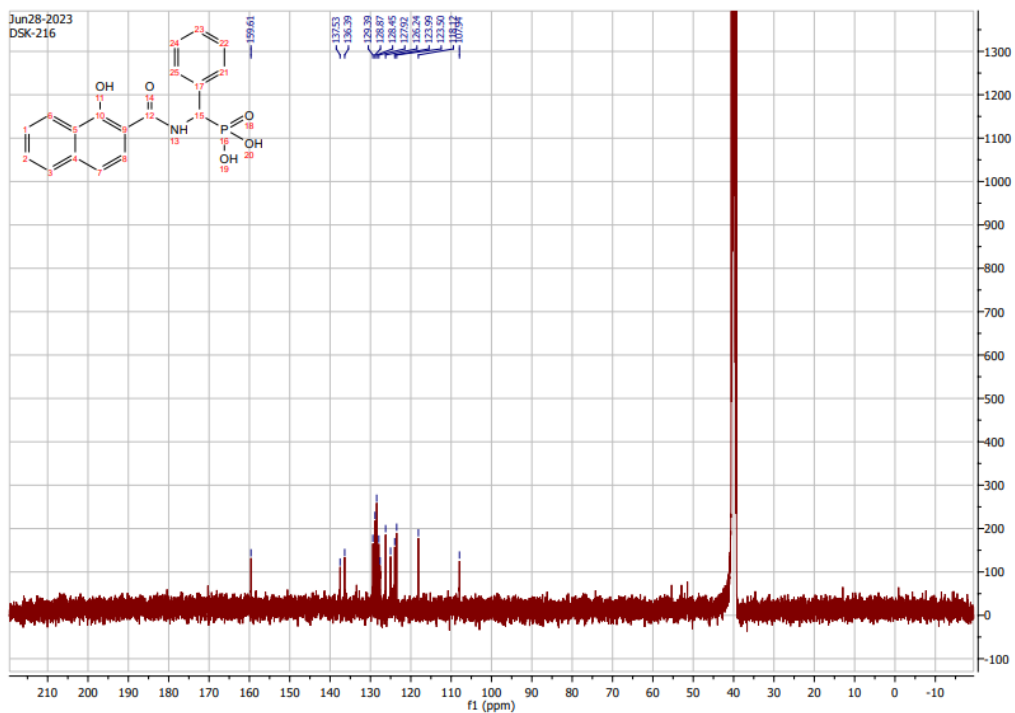

**Figure S48**  $^{13}\text{C}$  NMR spectrum of **22a** in  $[\text{D}_6]\text{-DMSO}$  (101 MHz, 300 K).

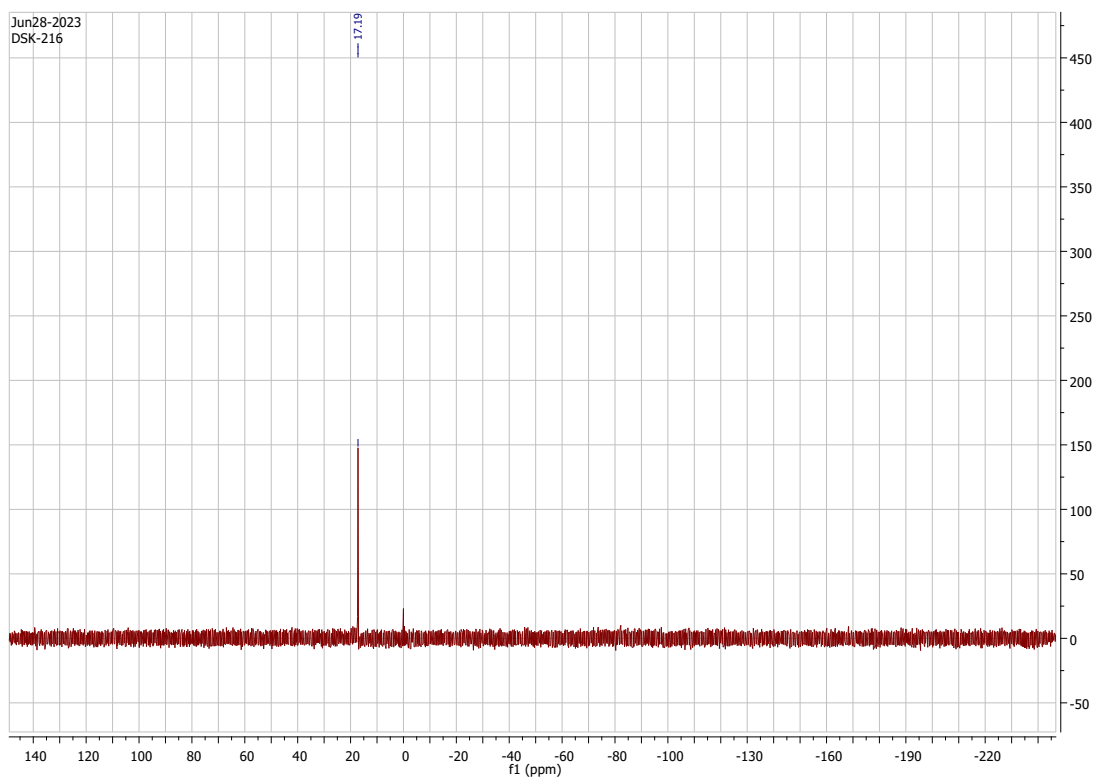

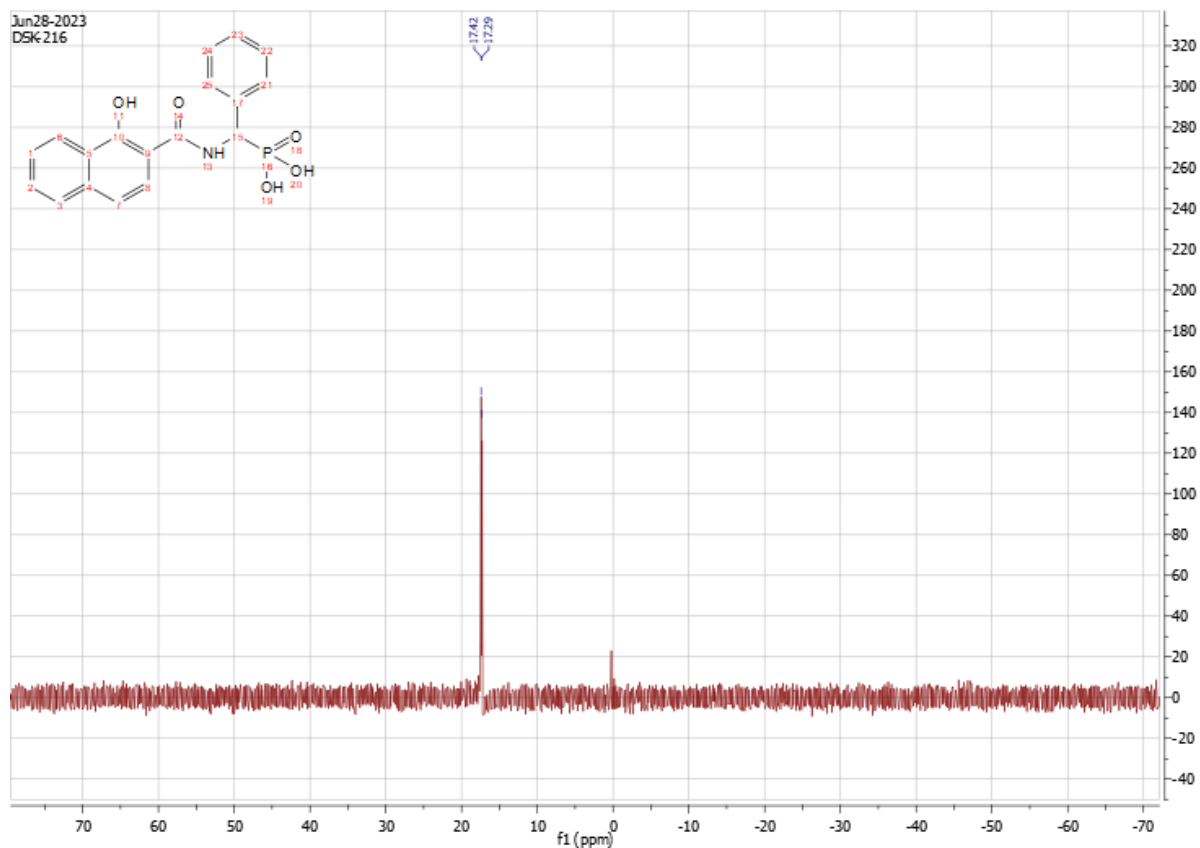

**Figure S49**  $^{31}\text{P}$  NMR spectrum of **22a** in  $[\text{D}_6]\text{-DMSO}$  (162 MHz, 300 K).

### HRMS

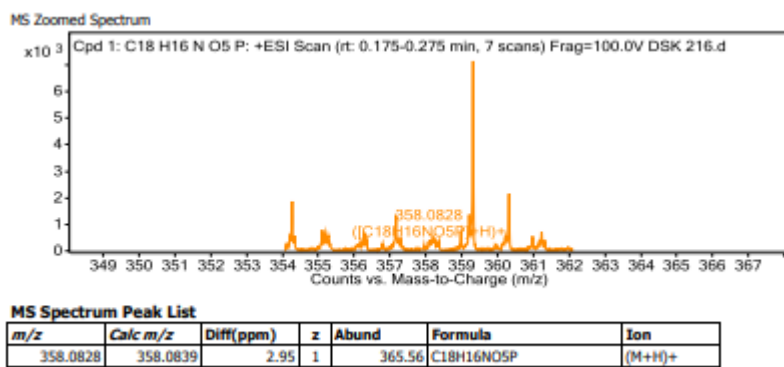

**Figure S50.** HRMS data for compound **22a**

### HPLC trace



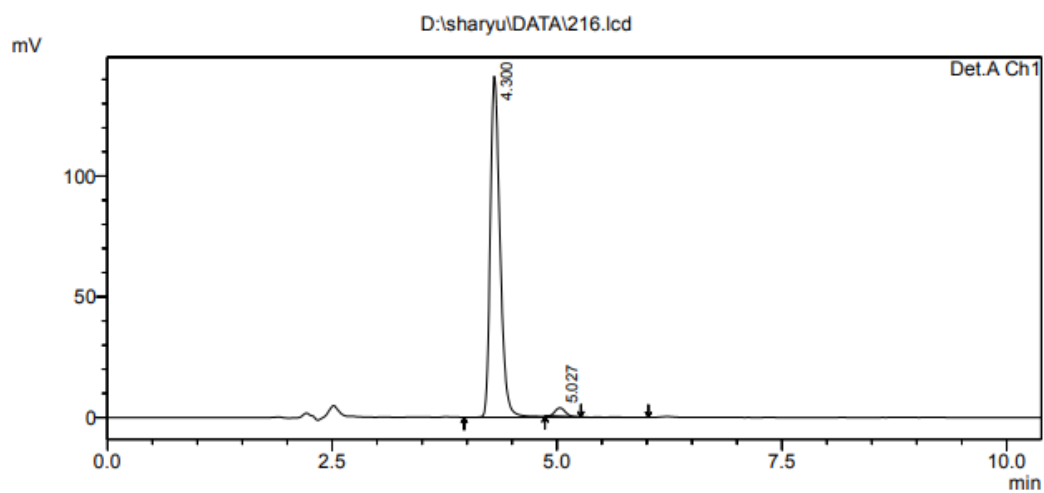

**Figure S51.** HPLC data for compound **22a**

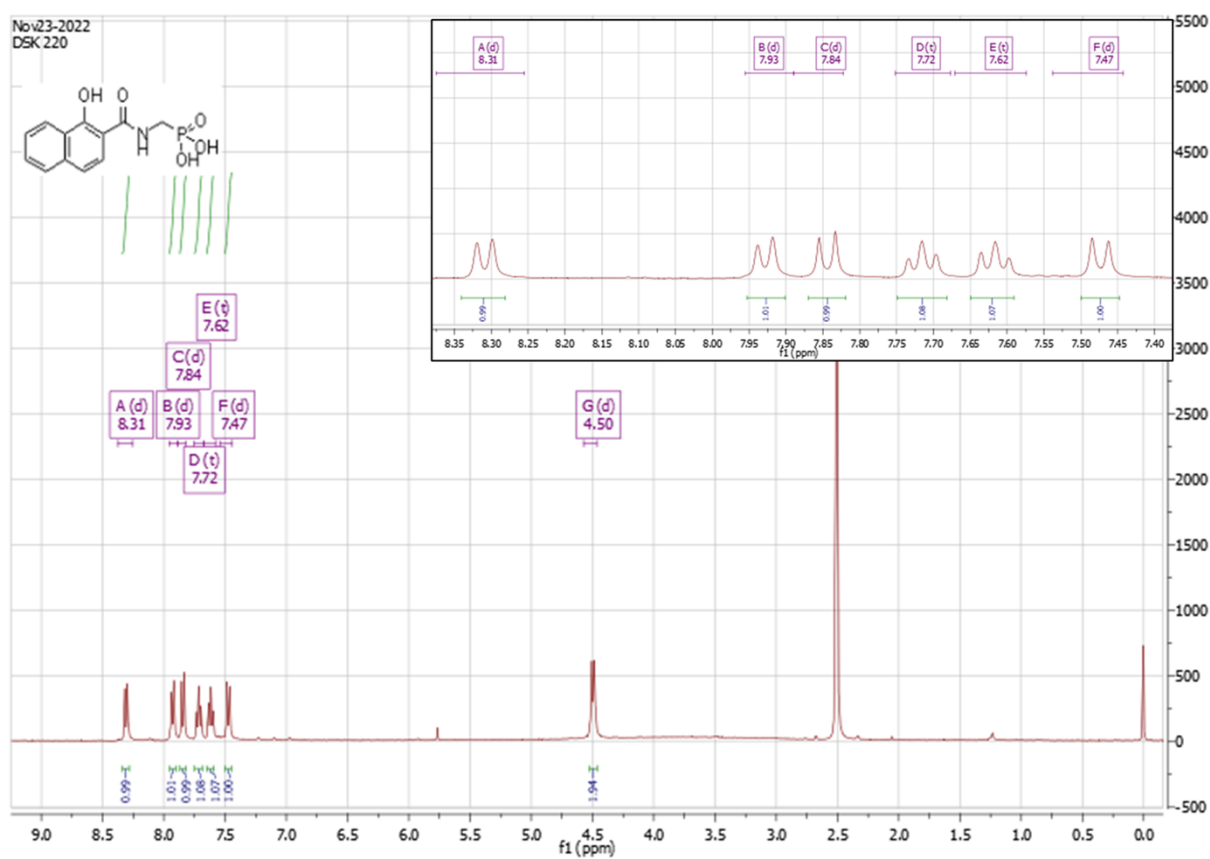

**Figure S52**  $^1\text{H}$  NMR spectrum of **22b** in  $[\text{D}_6]\text{-DMSO}$  (400 MHz, 300 K).

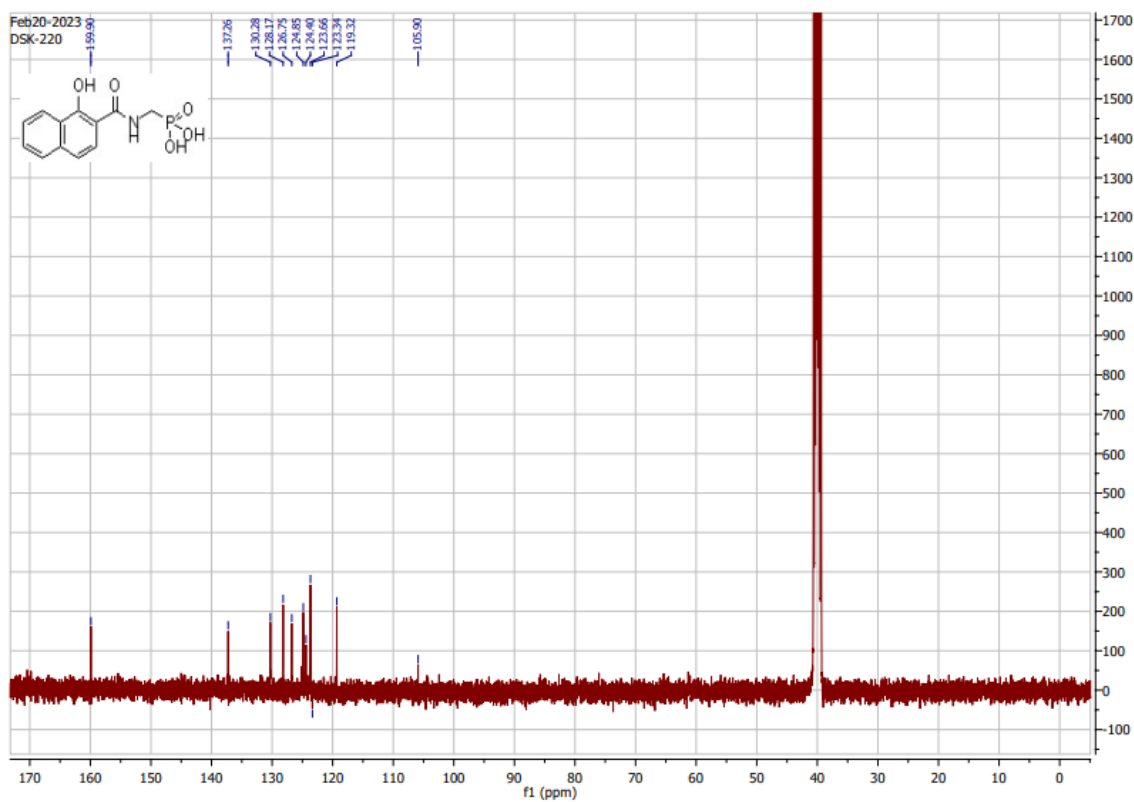

**Figure S53**  $^{13}\text{C}$  NMR spectrum of **22d** in  $[\text{D}_6]$ -DMSO (101 MHz, 300 K).

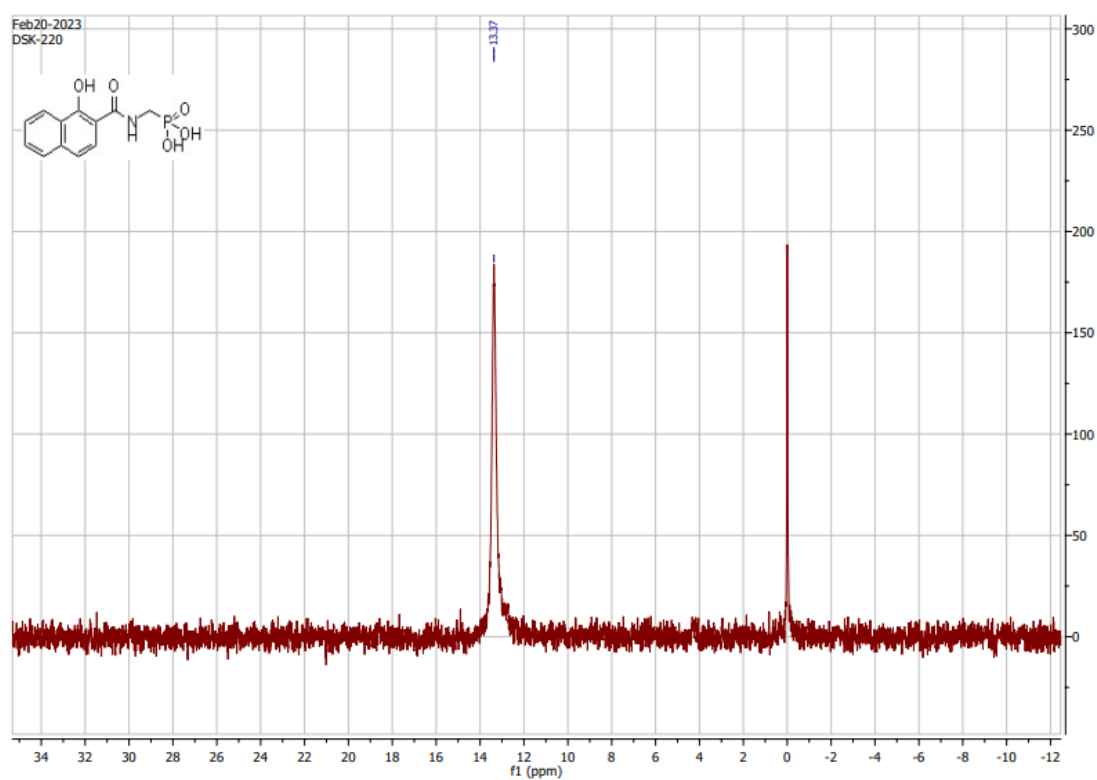

**Figure S54**  $^{31}\text{P}$  NMR spectrum of **22b** in  $[\text{D}_6]$ -DMSO (162 MHz, 300 K).

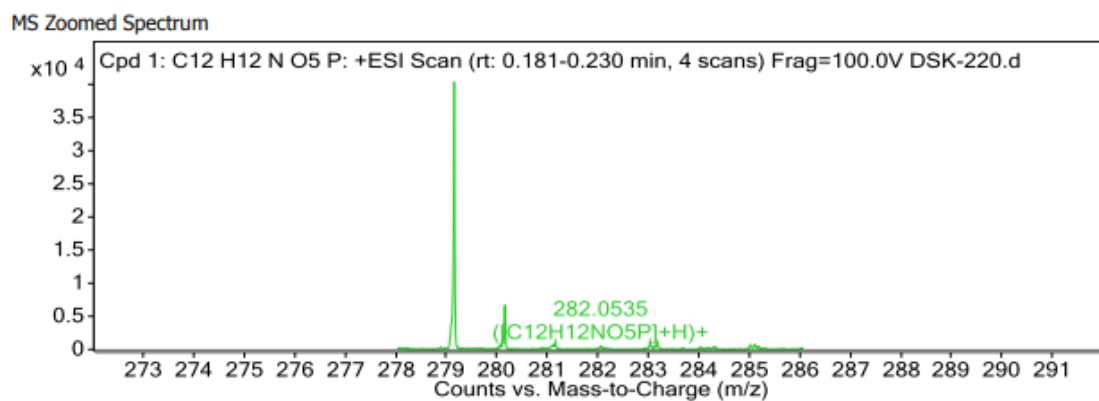

MS Spectrum Peak List

| <i>m/z</i> | <i>Calc m/z</i> | <i>Diff(ppm)</i> | <i>z</i> | <i>Abund</i> | <i>Formula</i>                                    | <i>Ion</i>         |
|------------|-----------------|------------------|----------|--------------|---------------------------------------------------|--------------------|
| 282.0535   | 282.0526        | -3.15            | 1        | 537.16       | C <sub>12</sub> H <sub>12</sub> NO <sub>5</sub> P | (M+H) <sup>+</sup> |

Figure S55. HRMS data for compound **22b**

<Chromatogram>

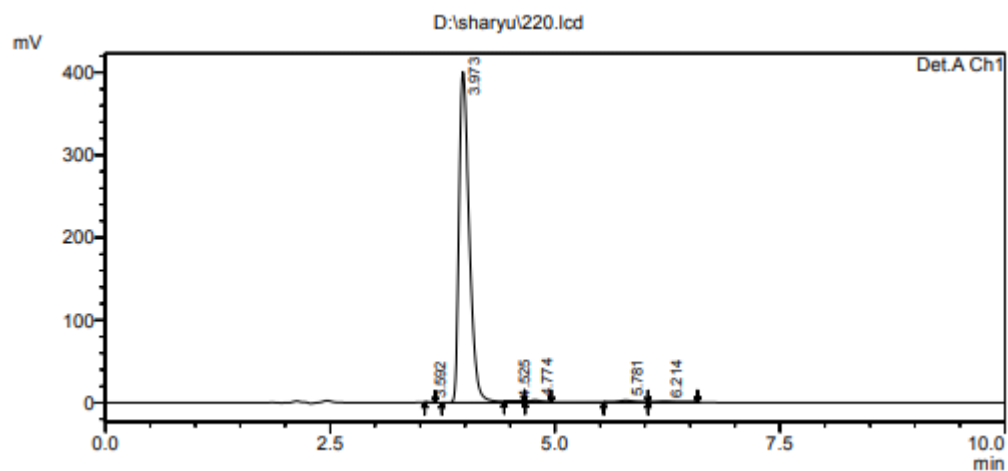

Figure S56. HPLC data for compound **22b**

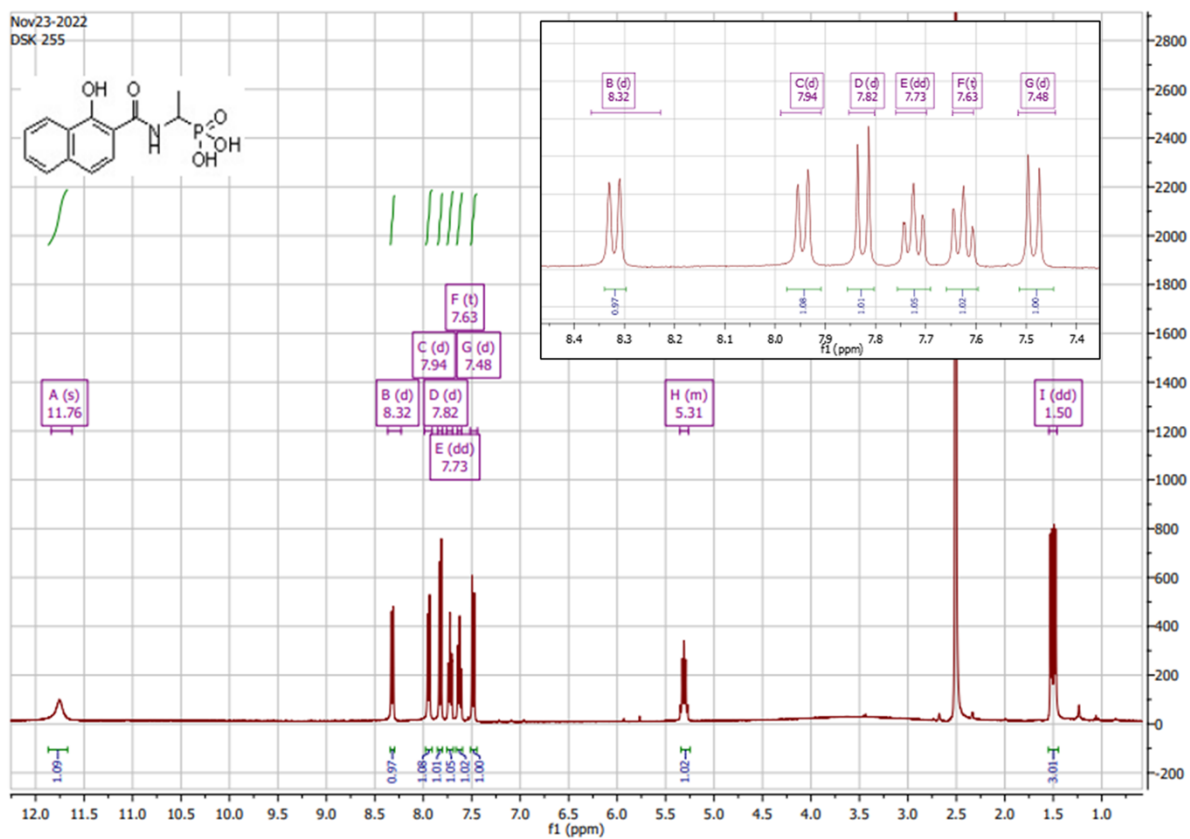

**Figure S57**  $^1\text{H}$  NMR spectrum of **22c** in  $[\text{D}_6]$ -DMSO (400 MHz, 300 K).

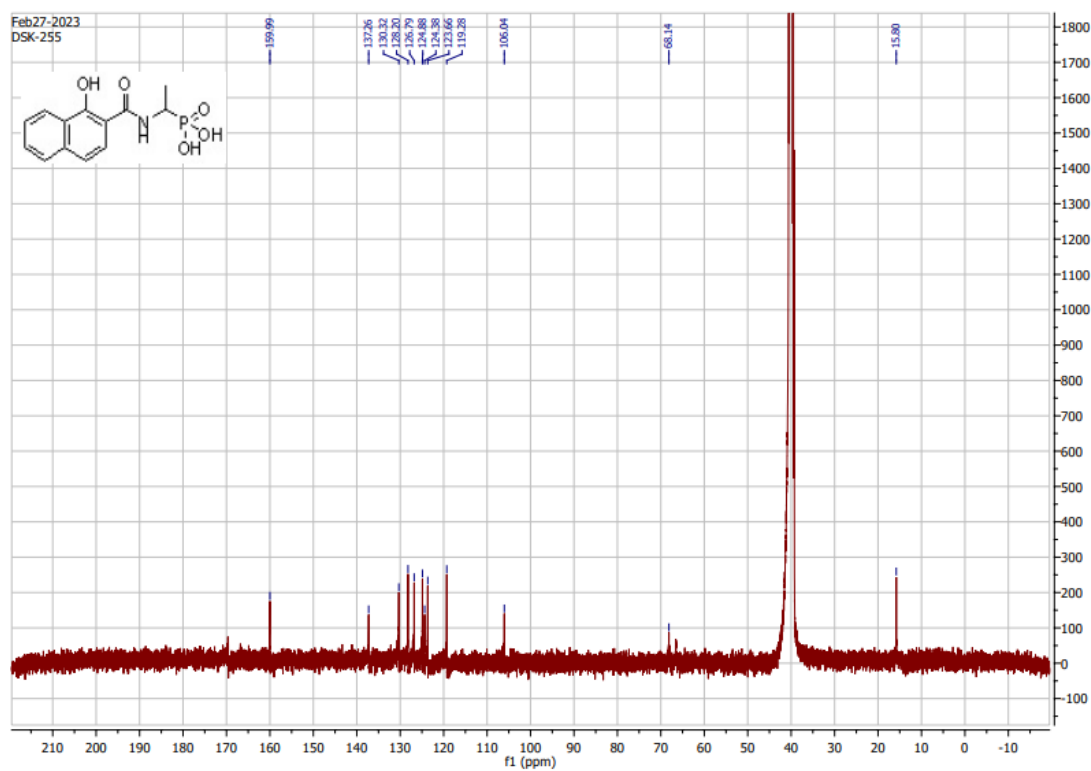

**Figure S58**  $^{13}\text{C}$  NMR spectrum of **22c** in  $[\text{D}_6]$ -DMSO (101 MHz, 300 K).

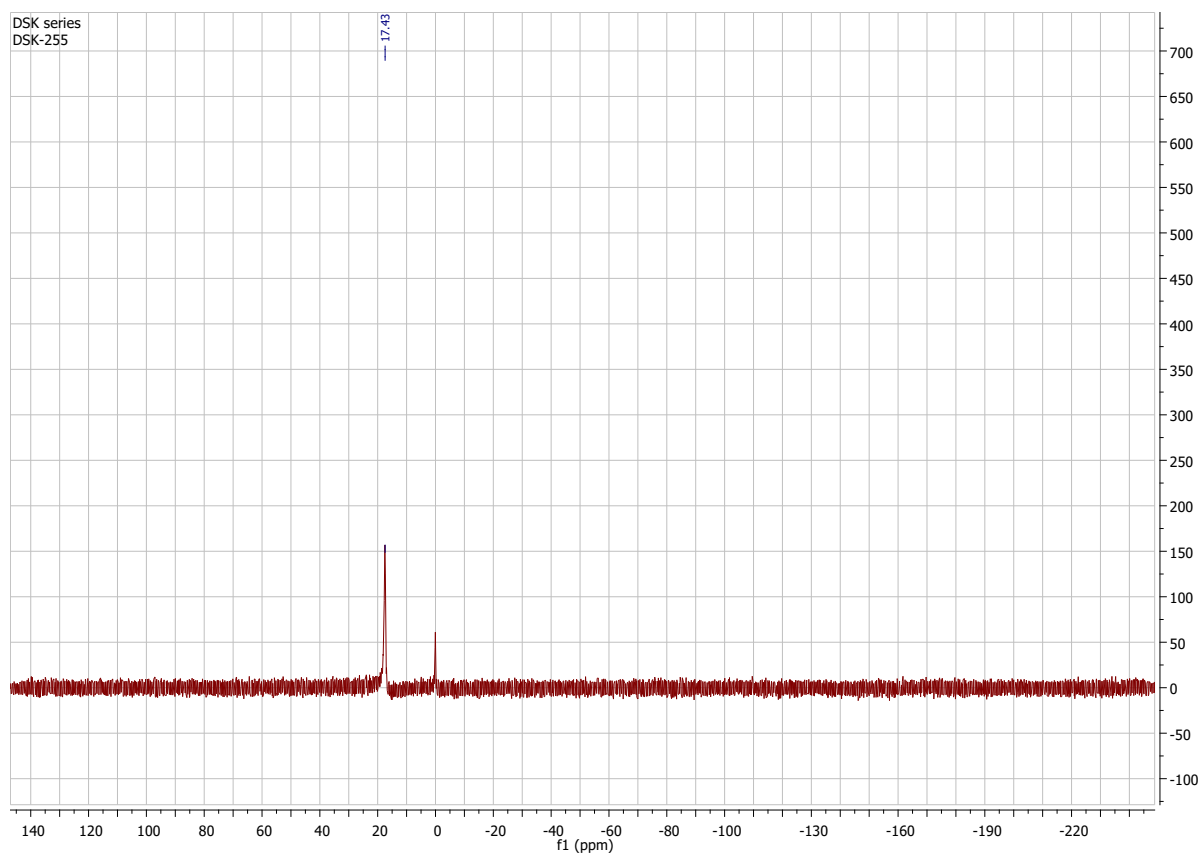

**Figure S59** 31P NMR spectrum of **22c** in [D<sub>6</sub>]-DMSO (162 MHz, 300 K).

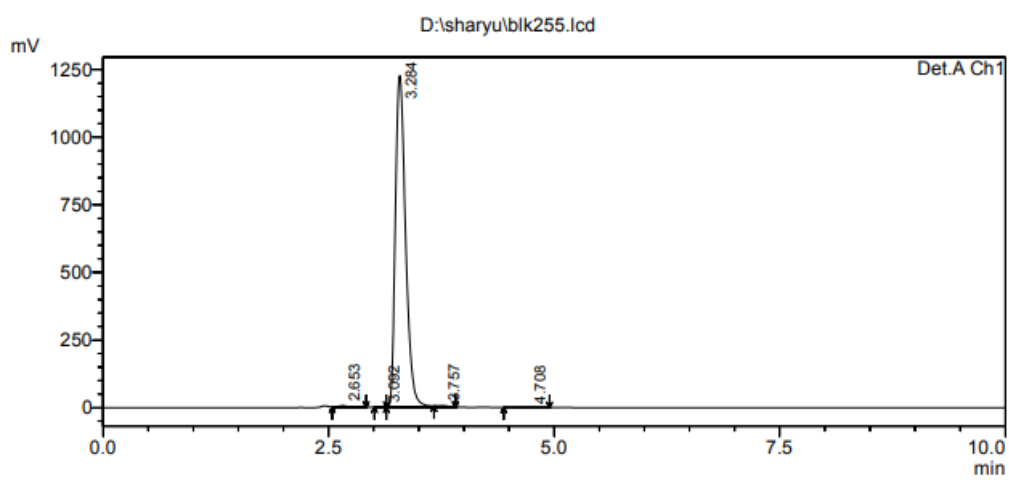

**Figure S60.** HPLC data for compound **22c**

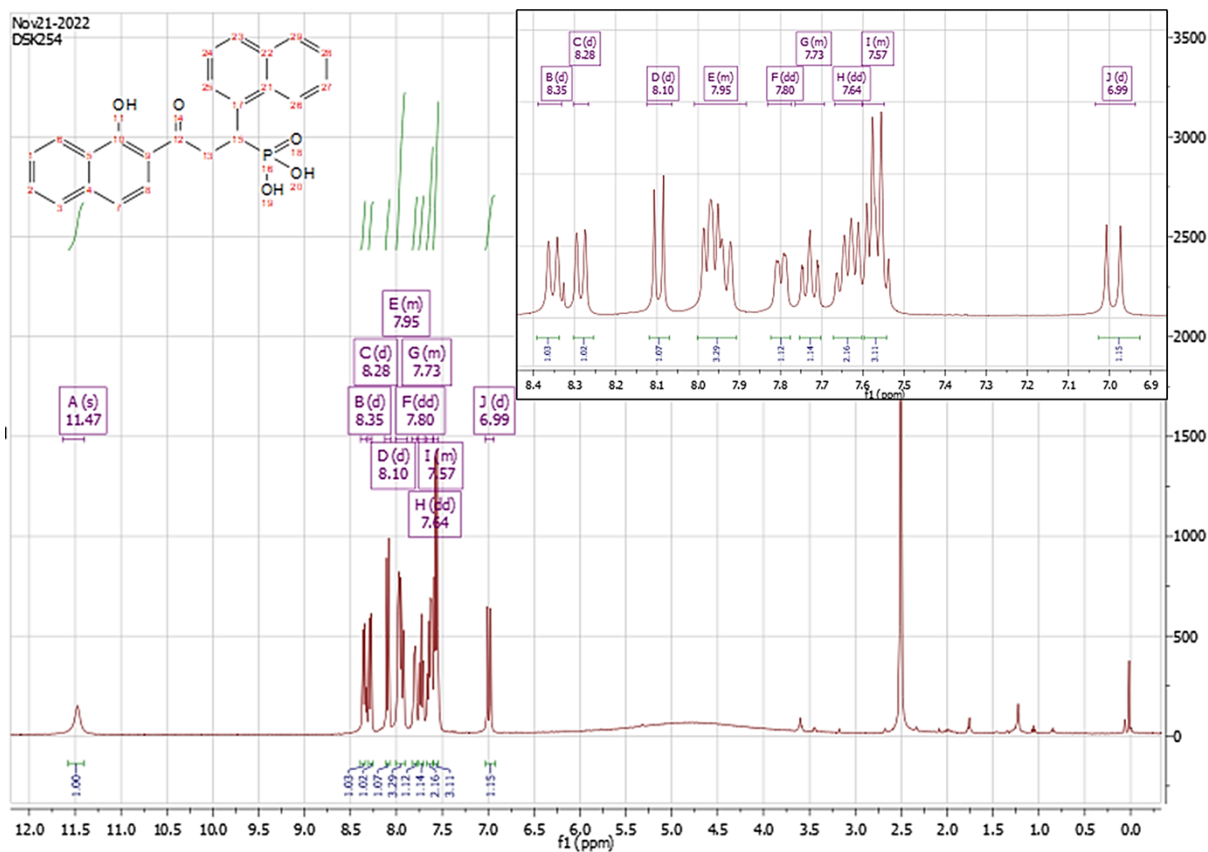

**Figure S61**  $^1\text{H}$  NMR spectrum of **22d** in  $[\text{D}_6]\text{-DMSO}$  (400 MHz, 300 K).

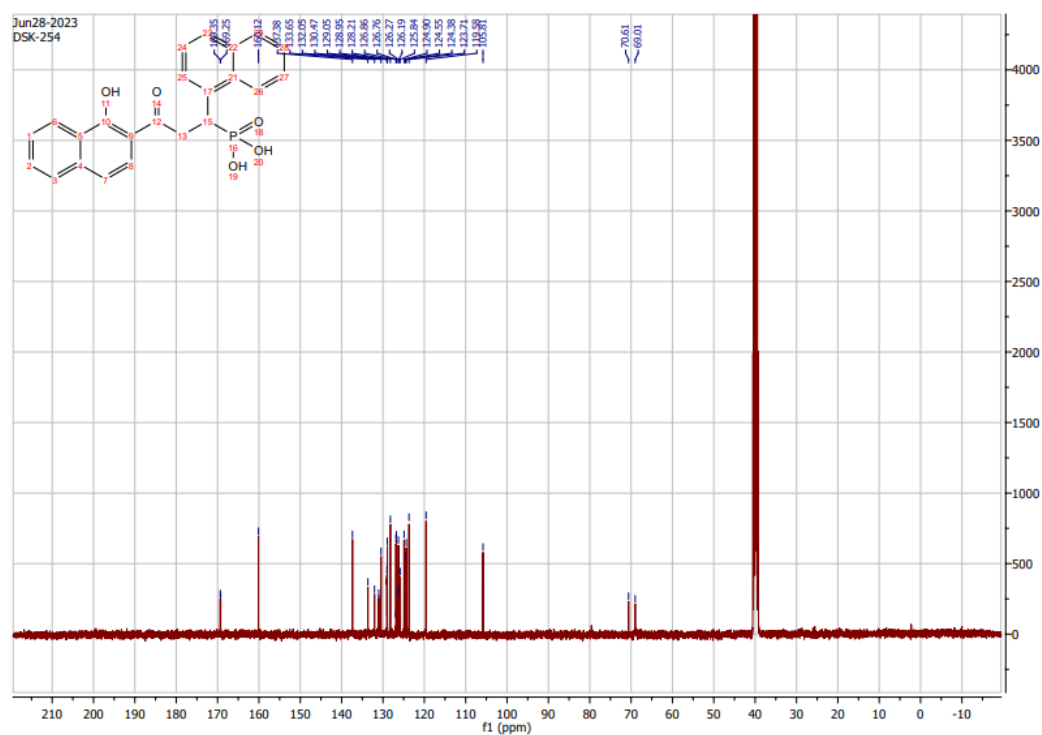

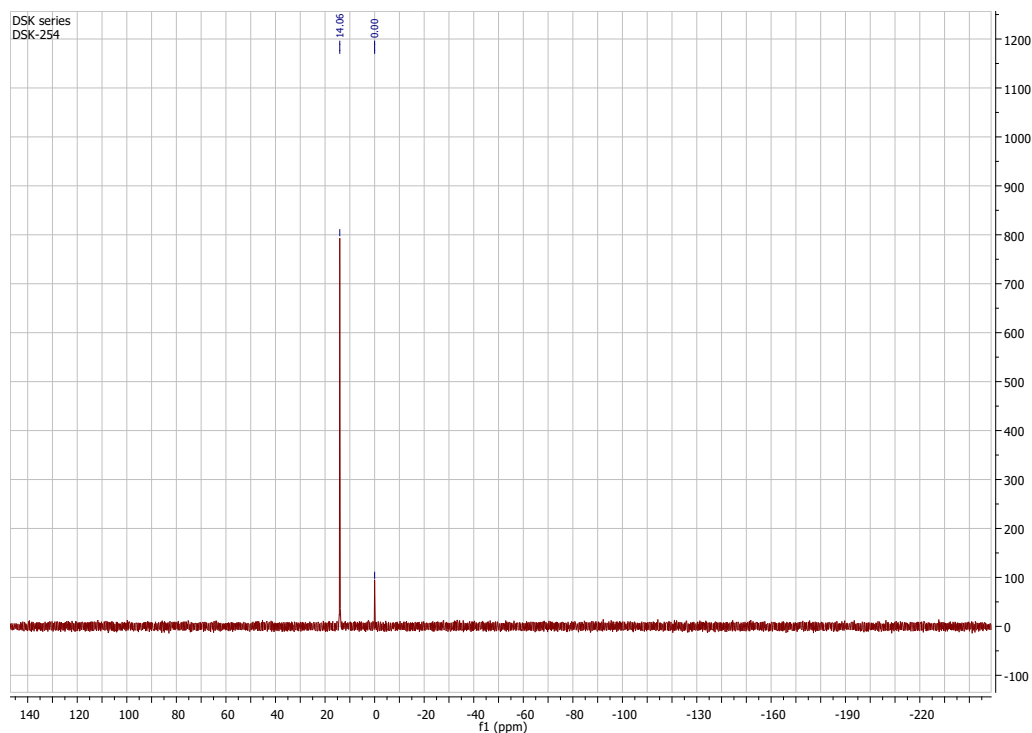

**Figure S63**  $^{31}\text{P}$  NMR spectrum of **22d** in  $[\text{D}_6]$ -DMSO (400 MHz, 300 K).

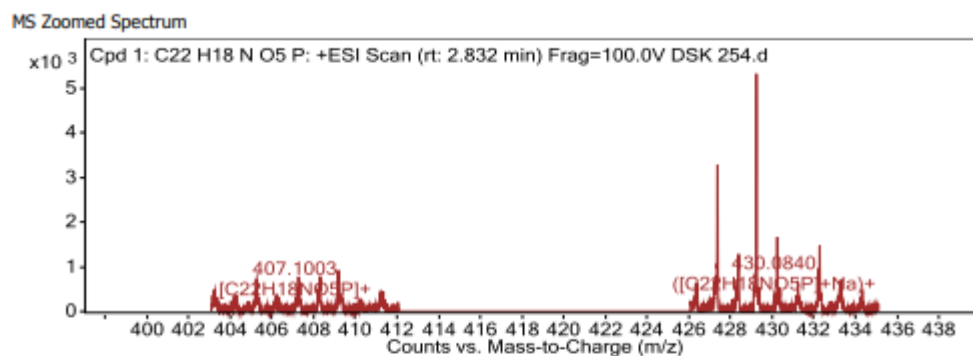

**MS Spectrum Peak List**

| $m/z$    | Calc $m/z$ | Diff (ppm) | $z$ | Abund  | Formula                                         | Ion                      |
|----------|------------|------------|-----|--------|-------------------------------------------------|--------------------------|
| 407.1003 | 407.0917   | -21.14     | 1   | 223.79 | $\text{C}_{22}\text{H}_{18}\text{NO}_5\text{P}$ | $\text{M}^+$             |
| 408.0877 | 408.0995   | 28.96      | 1   | 124.2  | $\text{C}_{22}\text{H}_{18}\text{NO}_5\text{P}$ | $(\text{M}+\text{H})^+$  |
| 430.084  | 430.0815   | -5.82      | 1   | 345.85 | $\text{C}_{22}\text{H}_{18}\text{NO}_5\text{P}$ | $(\text{M}+\text{Na})^+$ |
| 431.0903 | 431.0848   | -12.8      | 1   | 198.17 | $\text{C}_{22}\text{H}_{18}\text{NO}_5\text{P}$ | $(\text{M}+\text{Na})^+$ |

**Figure S64.** HRMS data for compound **22d**

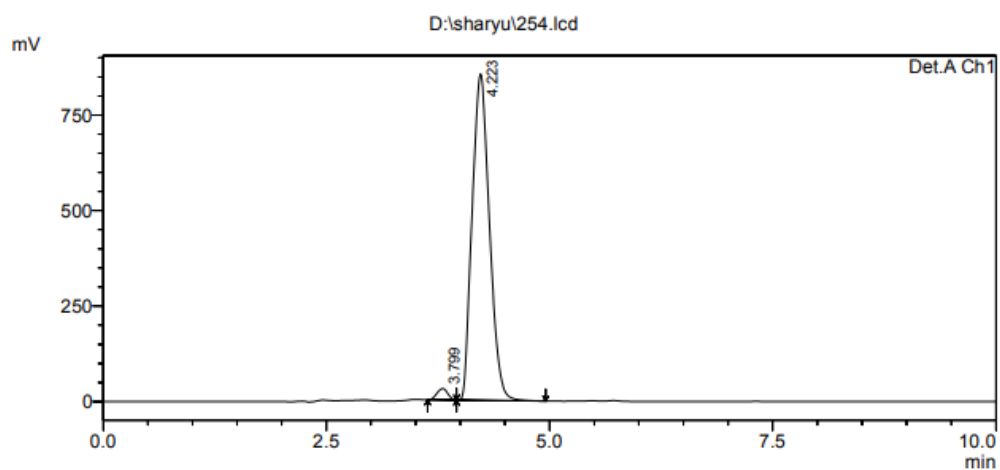

**Figure S65.** HPLC data for compound **22d**

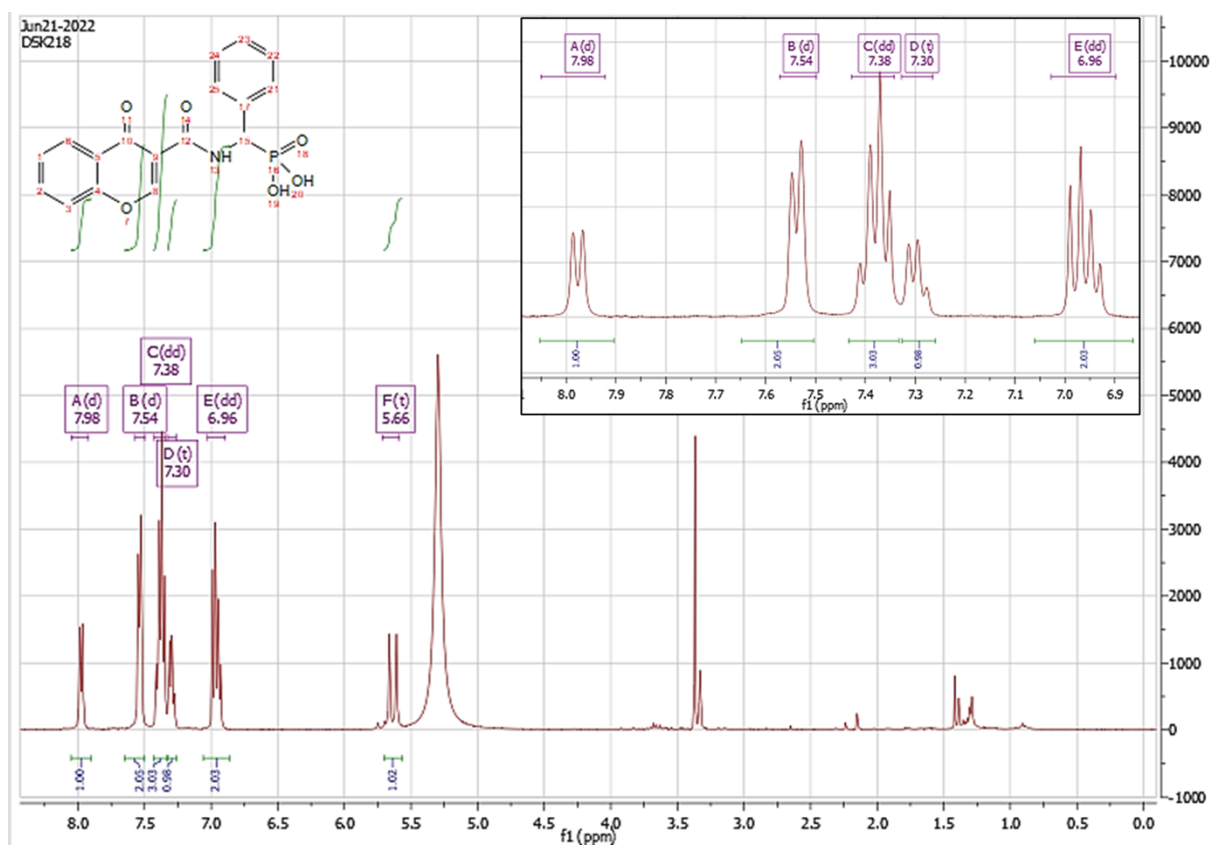

**Figure S66**  $^1\text{H}$  NMR spectrum of **23a** in  $[\text{D}_6]$ -DMSO (400 MHz, 300 K).



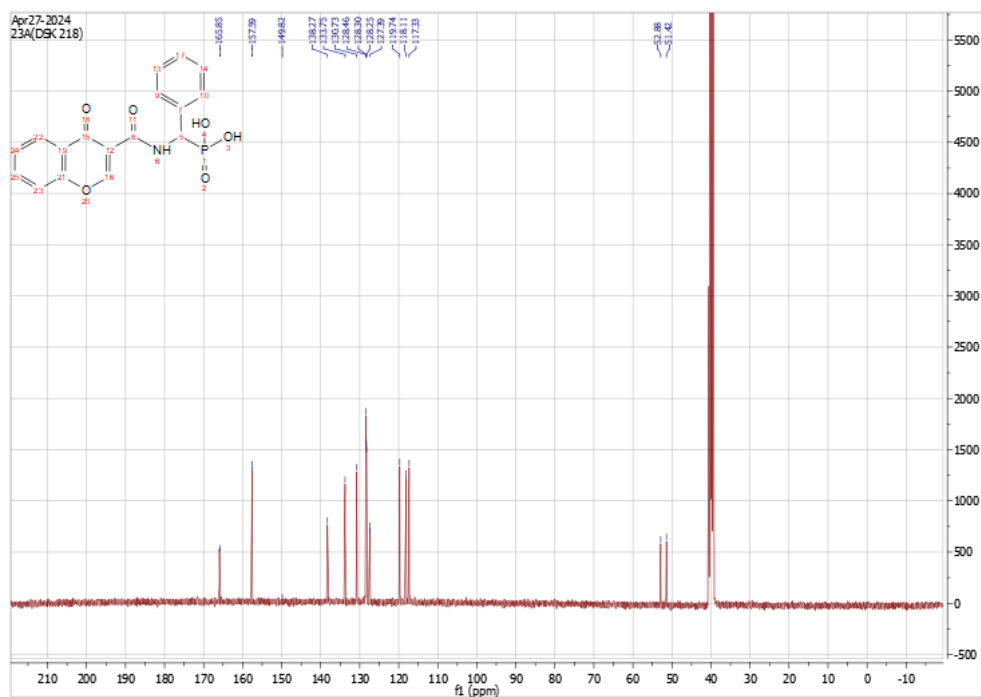

**Figure S67**  $^{13}\text{C}$  NMR spectrum of **23a** in  $[\text{D}_6]\text{-DMSO}$  (101 MHz, 300 K).

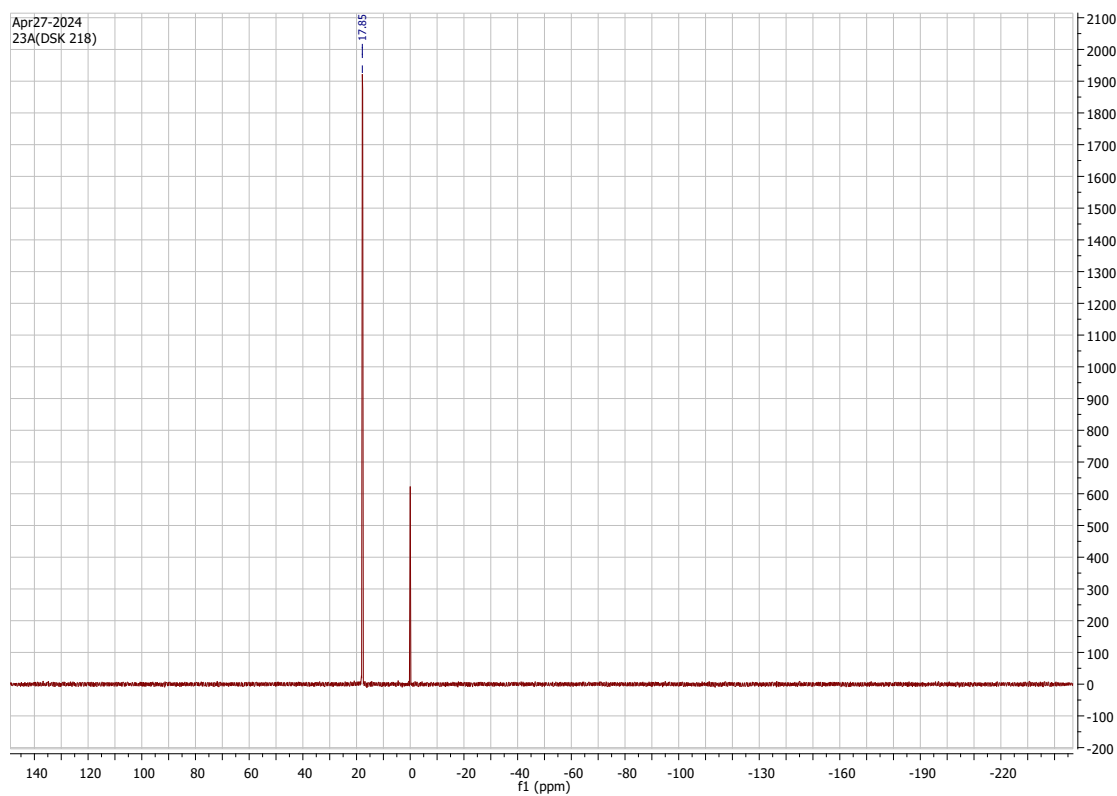

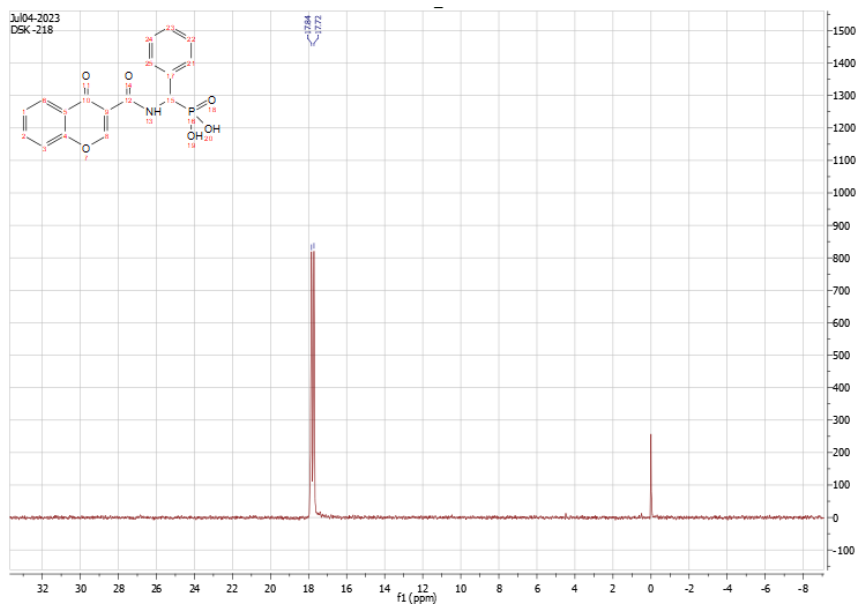

**Figure S68**  $^{31}\text{P}$  NMR spectrum of **23a** in  $[\text{D}_6]$ -DMSO (162 MHz, 300 K).

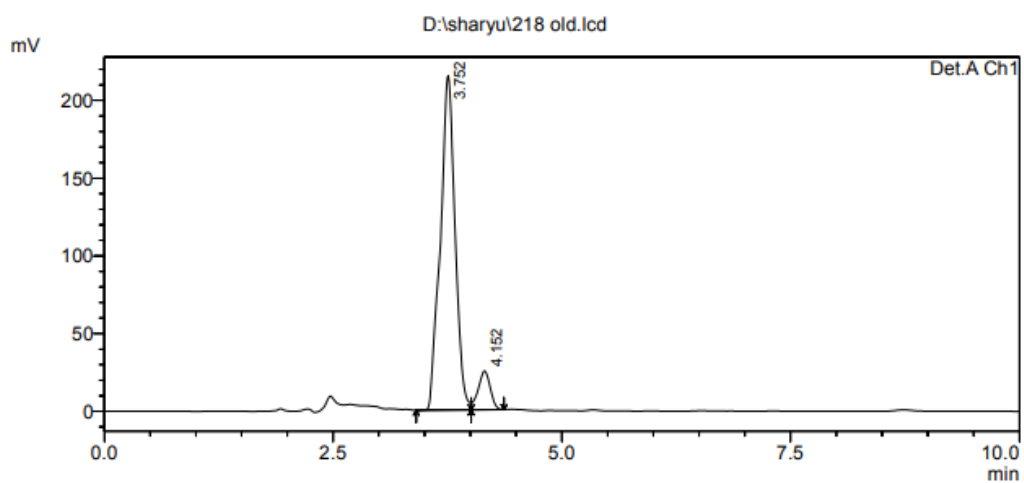

**Figure S69.** HPLC data for compound **23a**

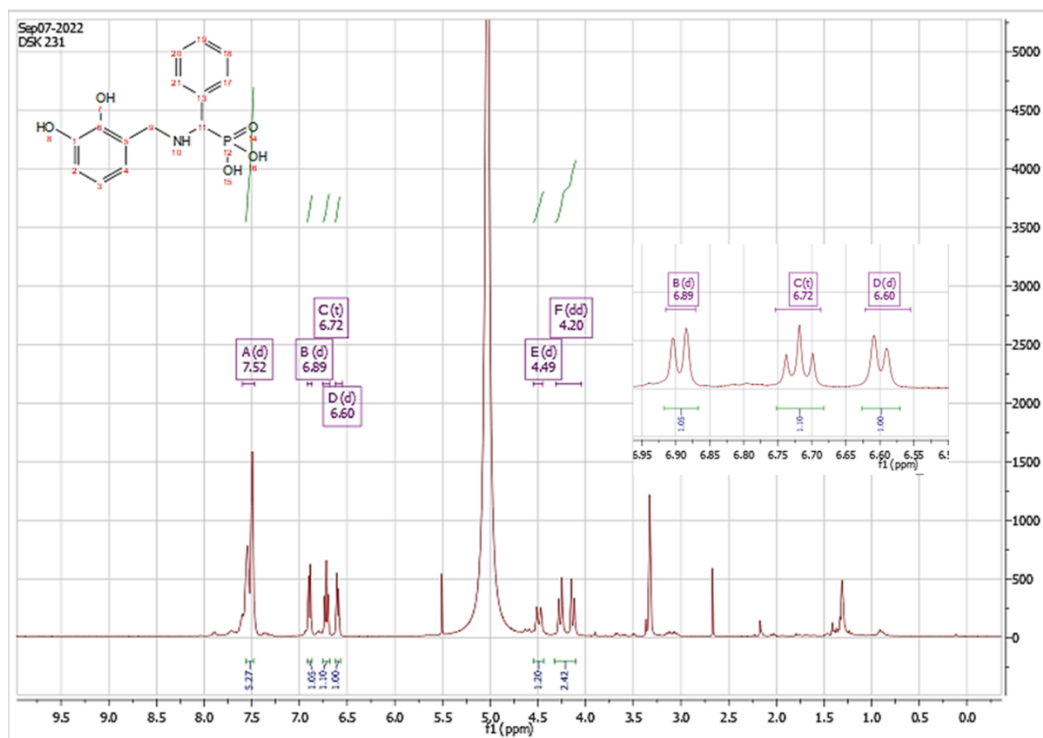

**Figure S70**  $^1\text{H}$  NMR spectrum of **28a** in  $[\text{D}_4]\text{-MeOD}$  (400 MHz, 300 K).

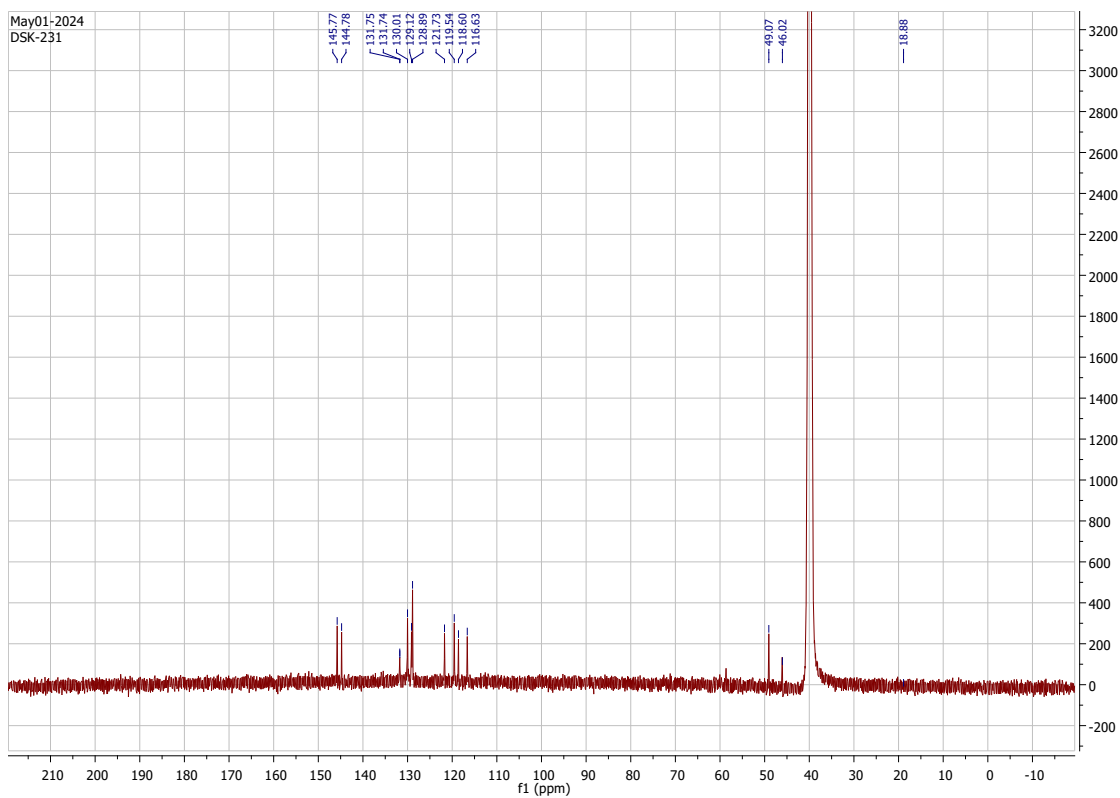

**Figure S71**  $^{13}\text{C}$  NMR spectrum of **28a** in  $[\text{D}_6]\text{-DMSO}$  (101 MHz, 300 K).

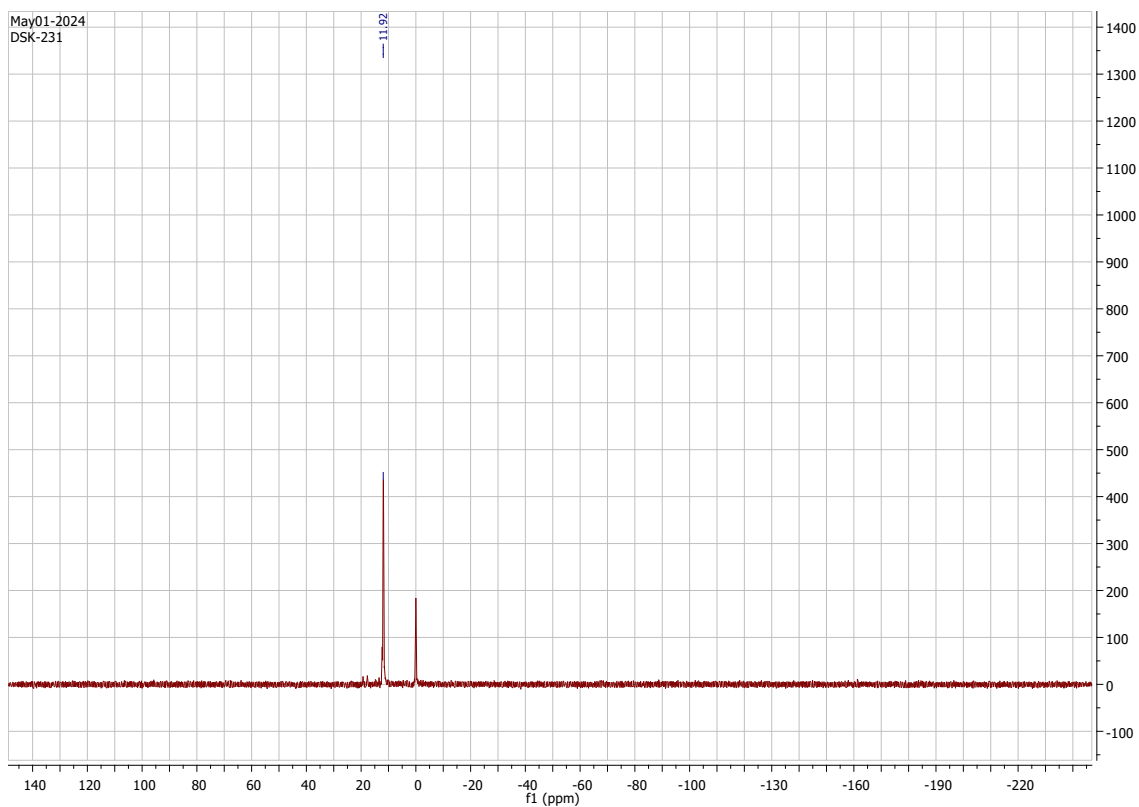

**Figure S72**  $^{31}\text{P}$  NMR spectrum of **28a** in  $[\text{D}_6]$ -DMSO (162 MHz, 300 K).

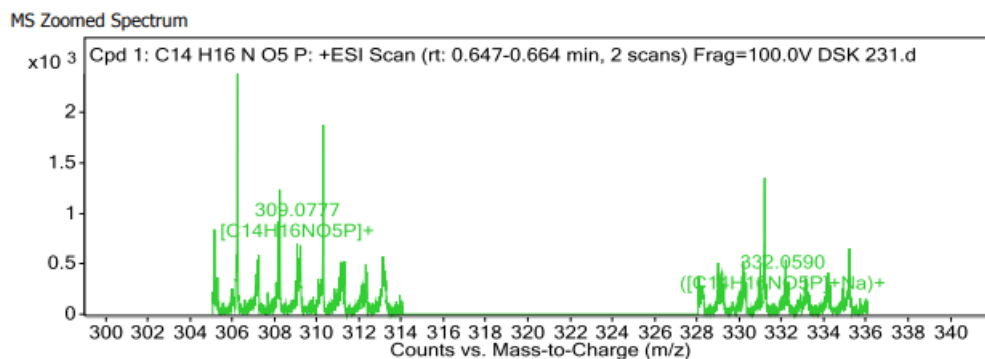

**MS Spectrum Peak List**

| <i>m/z</i> | <i>Calc m/z</i> | <i>Diff(ppm)</i> | <i>z</i> | <i>Abund</i> | <i>Formula</i>                                                  | <i>Ion</i>          |
|------------|-----------------|------------------|----------|--------------|-----------------------------------------------------------------|---------------------|
| 309.0777   | 309.0761        | -5.28            | 1        | 704.96       | C <sub>14</sub> H <sub>16</sub> N <sub>0</sub> O <sub>5</sub> P | M <sup>+</sup>      |
| 310.0776   | 310.0839        | 20.39            | 1        | 364.03       | C <sub>14</sub> H <sub>16</sub> N <sub>0</sub> O <sub>5</sub> P | (M+H) <sup>+</sup>  |
| 332.059    | 332.0658        | 20.54            | 1        | 186.95       | C <sub>14</sub> H <sub>16</sub> N <sub>0</sub> O <sub>5</sub> P | (M+Na) <sup>+</sup> |

**Figure S73.** HRMS data for compound **28a**

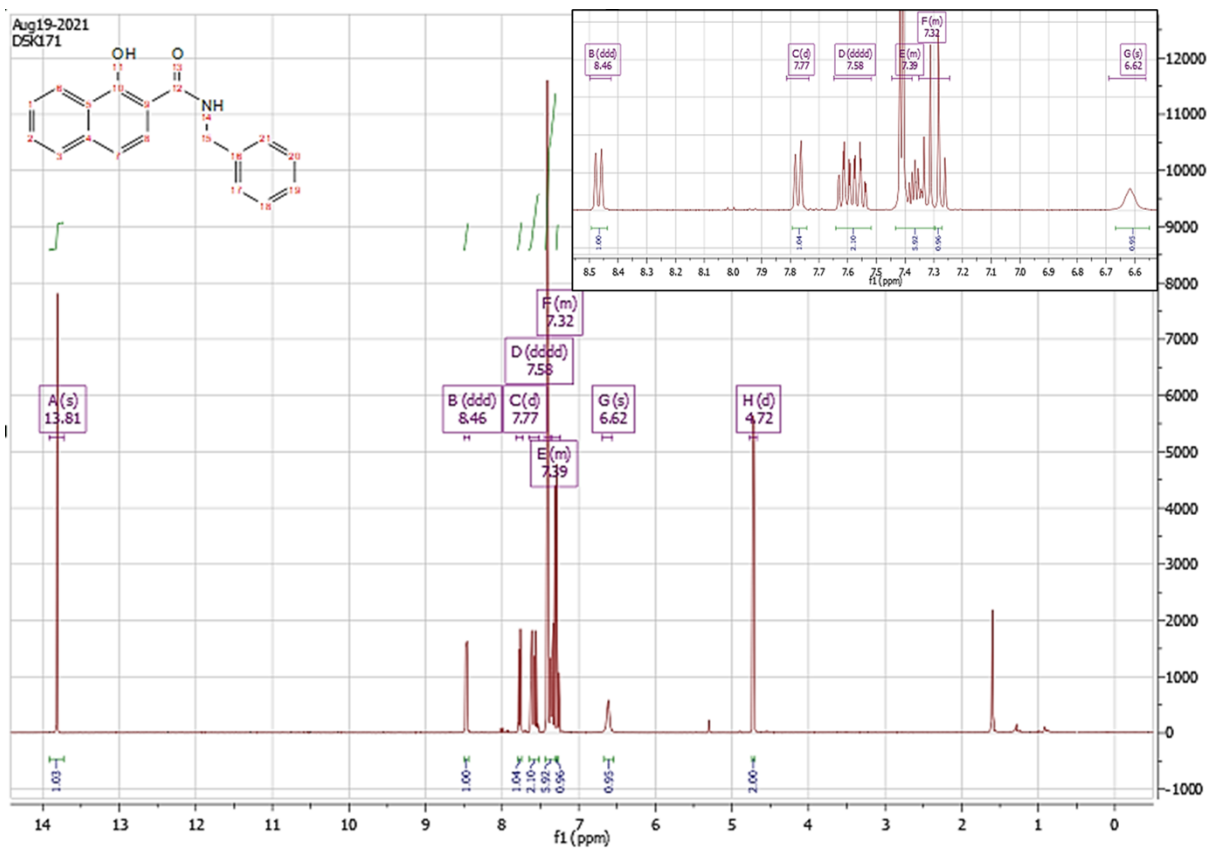

**Figure S74**  $^1\text{H}$  NMR spectrum of **25a** in  $[\text{D}]-\text{CDCl}_3$  (400 MHz, 300 K).

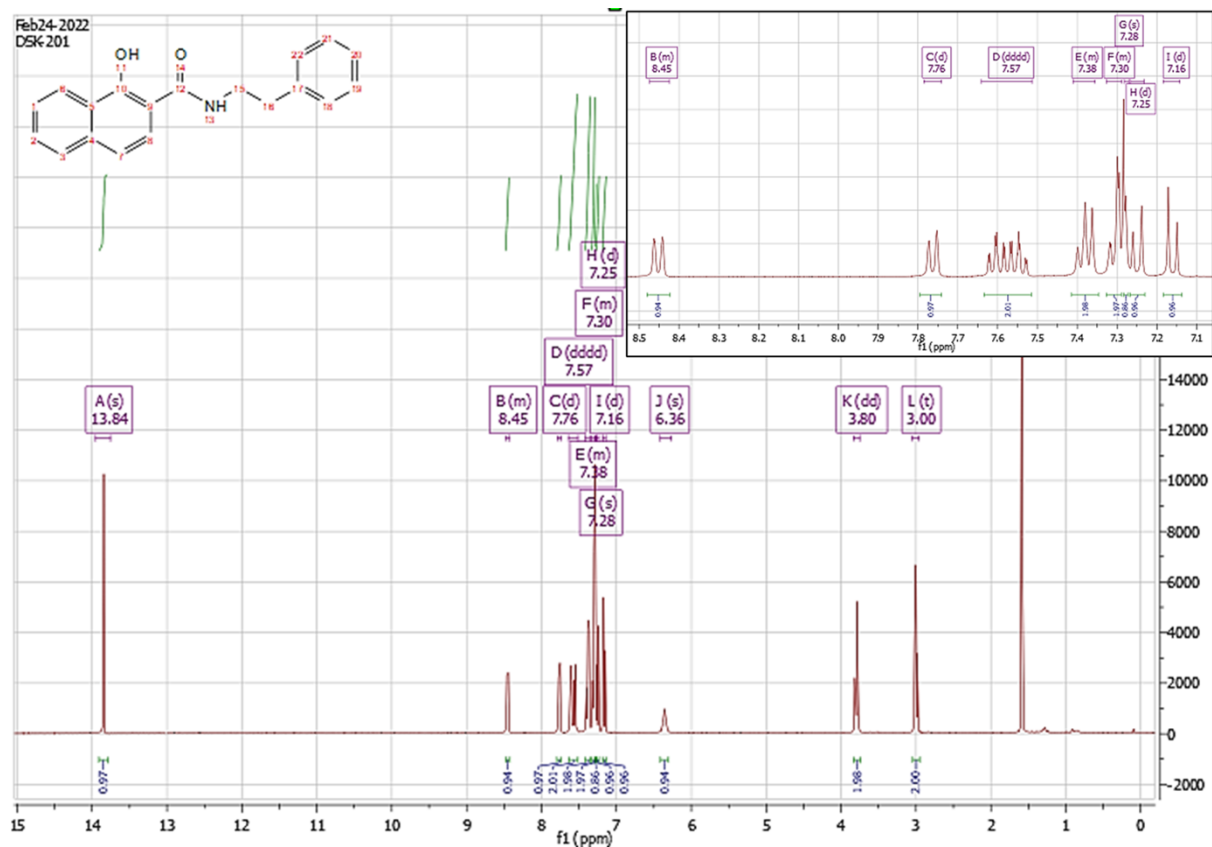

Figure S75 1H NMR spectrum of **25b** in [D]-CDCl<sub>3</sub> (400 MHz, 300 K).

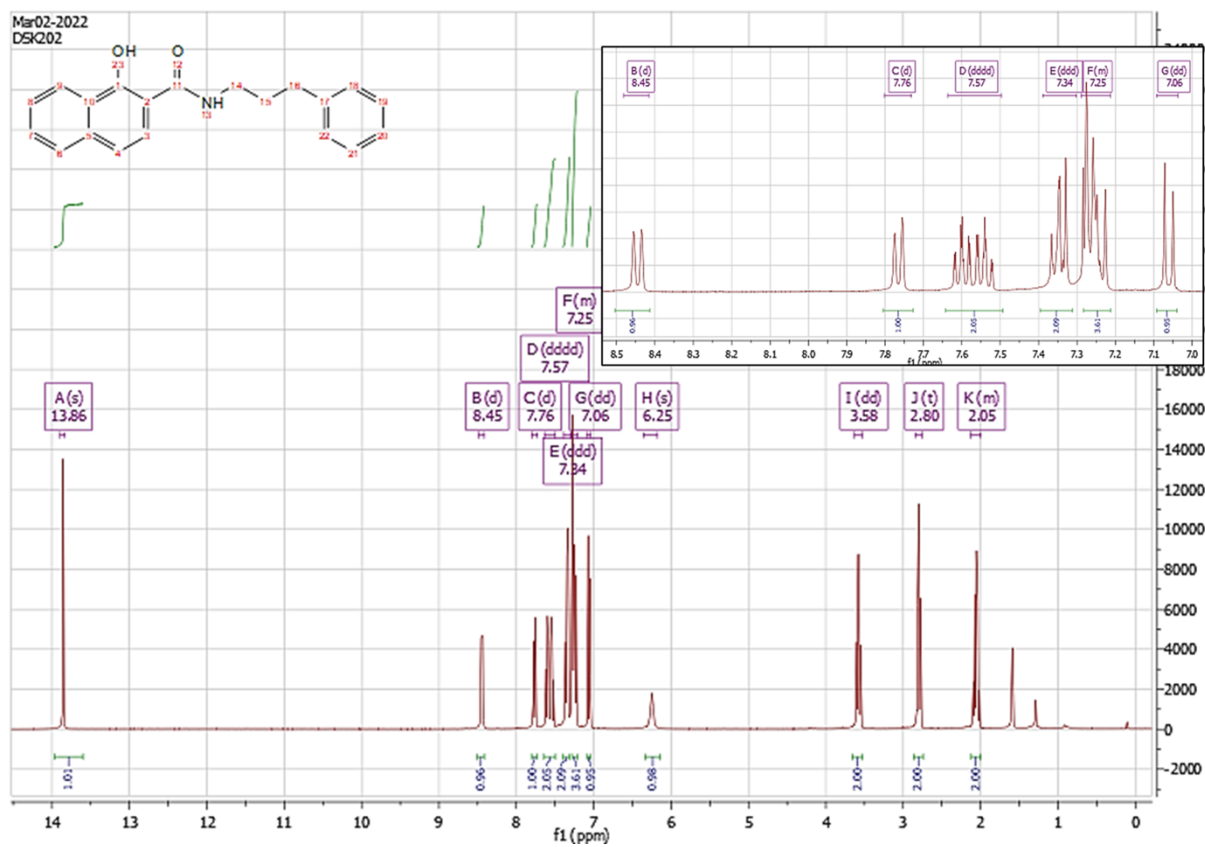

Figure S76 1H NMR spectrum of **25c** in [D]-CDCl<sub>3</sub> (400 MHz, 300 K).
